# Supplementary material for: New Substituted Benzoylthiourea Derivatives: From Design to Antimicrobial Applications
Source: PubMed Central journal article supplement (PMC7180980; doi:10.3390/molecules25071478), 2020-03-25
Supplement: molecules-25-01478-s001.pdf [file molecules-25-01478-s001.pdf]

Supplementary materials

# New Substituted Benzoylthiourea Derivatives: From Design to Antimicrobial Applications

Carmen Limban <sup>1</sup>, Mariana Carmen Chifiriuc <sup>2,\*</sup>, Miron Teodor Caproiu <sup>3</sup>, Florea Dumitrascu <sup>3</sup>, Marilena Ferbinteanu <sup>4</sup>, Lucia Pintilie <sup>5</sup>, Amalia Stefaniu <sup>5</sup>, Ilinca Margareta Vlad <sup>1</sup>, Coralia Bleotu <sup>6</sup>, Luminita Gabriela Marutescu <sup>2</sup> and Diana Camelia Nuta <sup>1</sup>

<sup>1</sup> Department of Pharmaceutical Chemistry, “Carol Davila” University of Medicine and Pharmacy, 020,956 Bucharest, Romania; carmen.limban@umfcd.ro (C.L.); ilinca.vlad@drd.umfcd.ro (I.M.V.); diana.nuta@umfcd.ro (D.C.N.)

<sup>2</sup> Department of Microbiology, Faculty of Biology & Research Institute of the University of Bucharest (ICUB), University of Bucharest, 060,101 Bucharest, Romania; lumi.marutescu@gmail.com

<sup>3</sup> The Organic Chemistry Center of Romanian Academy “C. D. Nenițescu”, 060,023 Bucharest, Romania; dorucaproiu@gmail.com (M.T.C.); fdumitra@yahoo.com (F.D.)

<sup>4</sup> Inorganic Chemistry Department, Faculty of Chemistry, University of Bucharest, 020,462 Bucharest, Romania; marilena.cimpoesu@g.unibuc.ro

<sup>5</sup> National Institute of Chemical-Pharmaceutical Research & Development, 031,299 Bucharest, Romania; lucia.pintilie@gmail.com (L.P.); astefaniu@gmail.com (A.S.)

<sup>6</sup> Stefan S. Nicolau Institute of Virology, Mihai Bravu 285, Bucharest, 030304, Romania; cbleotu@yahoo.com

\* Correspondence: carmen.chifiriuc@bio.unibuc.ro

Received: 21 February 2020; Accepted: 20 March 2020; Published: date

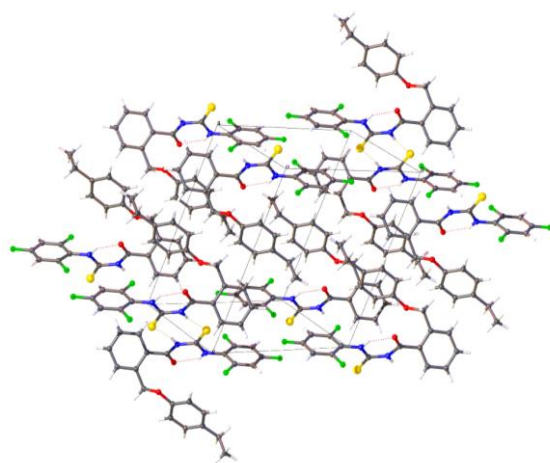

**Figure S1.** Packing diagram of the crystal structure of **5d** along *a* axis.

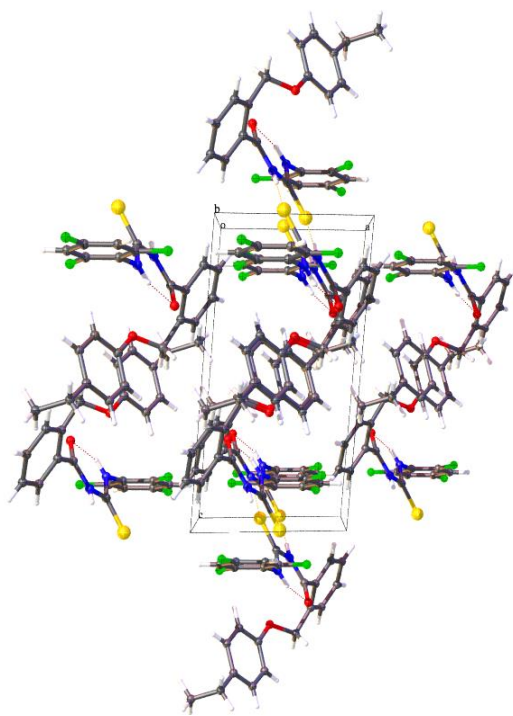

**Figure S2.** Packing diagram of the crystal structure of **5d** along *b* axis.

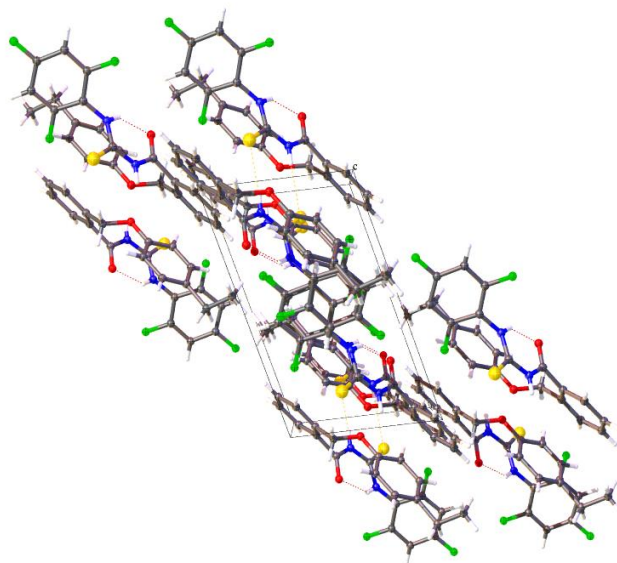

**Figure S3.** Packing diagram of the crystal structure of **5d** along *c* axis.

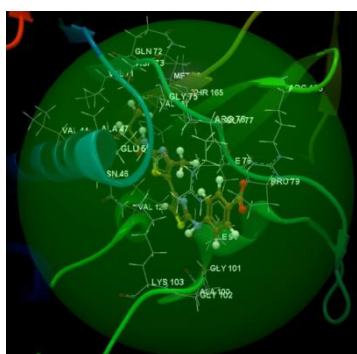

(a) Binding site and docking pose of the co-crystallized ligand interacting with residues.

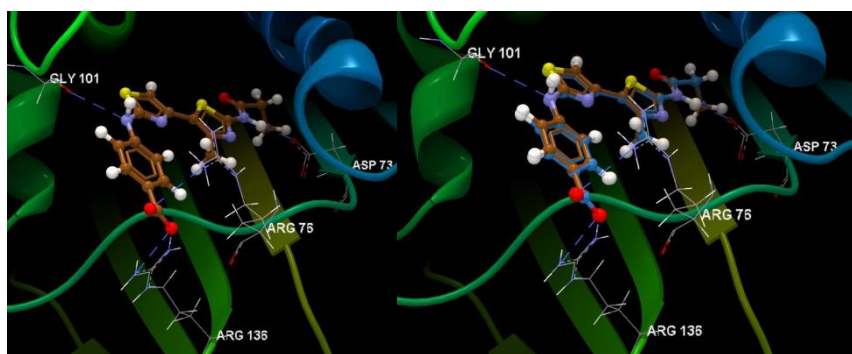

(b) Hydrogen bonds between the residues of the ARG 136, ARG 76, GLY 101 and ASP 73 and the co-crystallized

(c) Docking validation of co-crystallized ligand

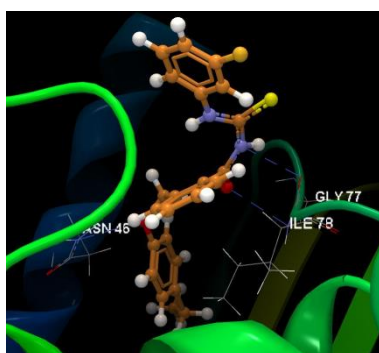

(d) Hydrogen bonds between the residues of the ASN 46, ILE 78, GLY 77 and the **5a** ligand

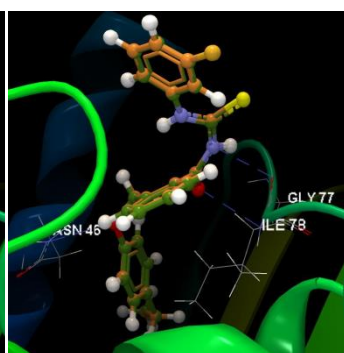

(e) Docking validation of **5a**.

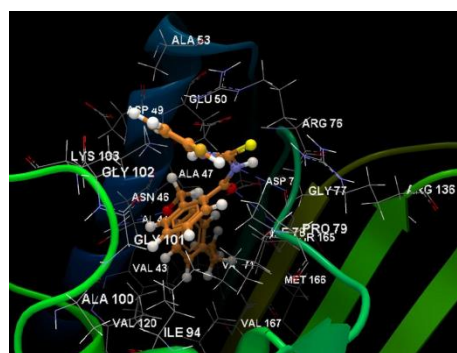

(f) Docking pose of the **5a** interacting with residues in the binding site.

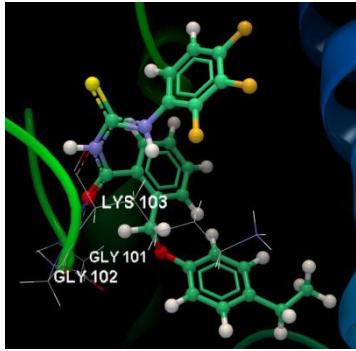

(g). Hydrogen bonds between the residues of the LYS 103, GLY 102, GLY 101 and the 5b ligand.

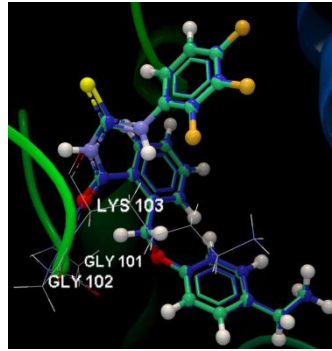

(h) Docking validation of 5b.

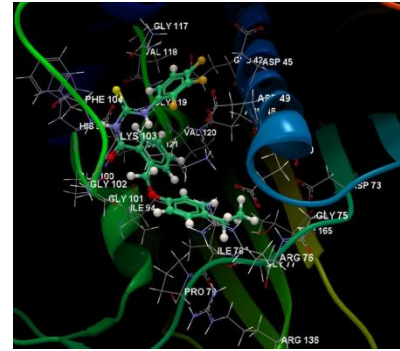

(i) Docking pose of the 5b interacting with residues in the binding site.

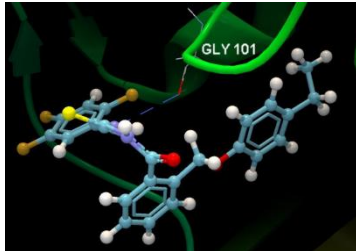

(j) Hydrogen bonds between the residues of the GLY 101 and the 5c ligand.

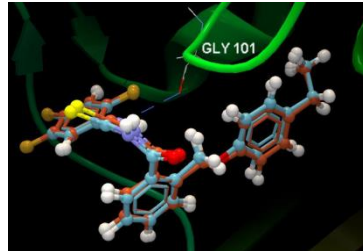

(k) Docking validation of 5c.

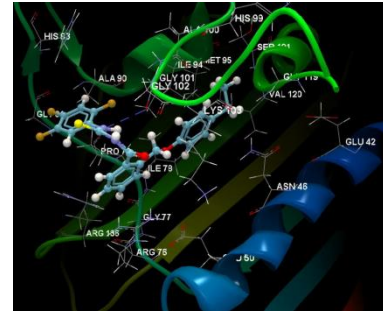

(l) Docking pose of the 5c interacting with residues in the binding site.

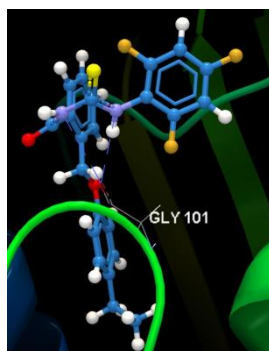

(m) Hydrogen bonds between the residues of the GLY 101 and the 5d ligand.

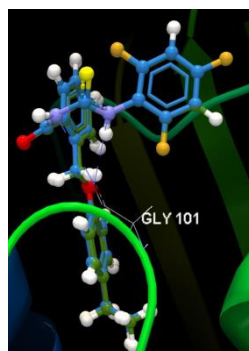

(n) Docking validation of 5d

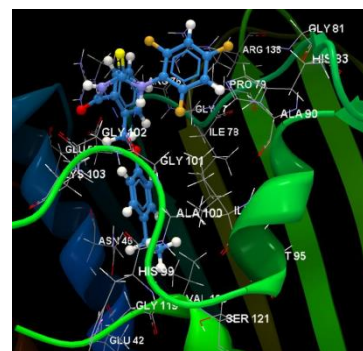

(o) Docking pose of the 5d interacting with residues in the binding site.



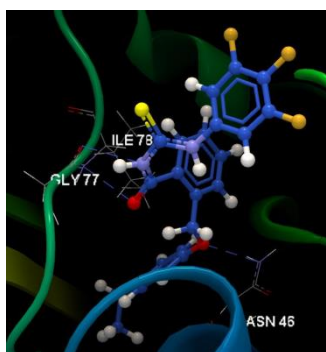

(p) Hydrogen bonds between the residues of the ASN 46, ILE 78, GLY 77 and the 5e ligand.

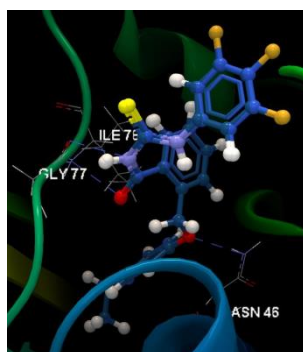

(r) Docking validation of 5e.

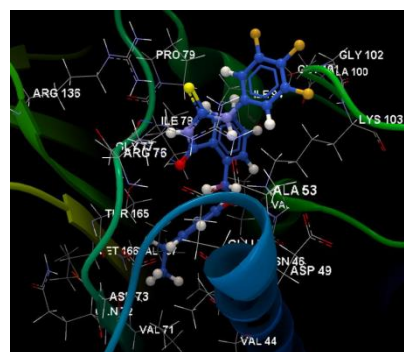

(s) Docking pose of the 5e interacting with residues in the binding site.

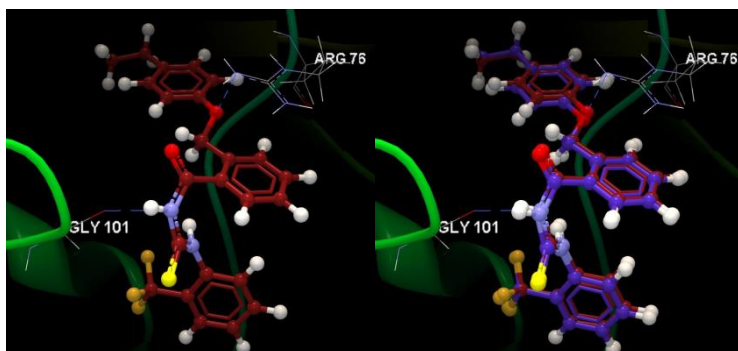

(t) Hydrogen bonds between the residues of the GLY 101 and ARG 76 and the 5f ligand.

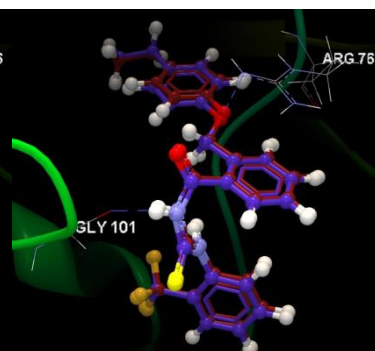

(u) Docking validation of 5f.

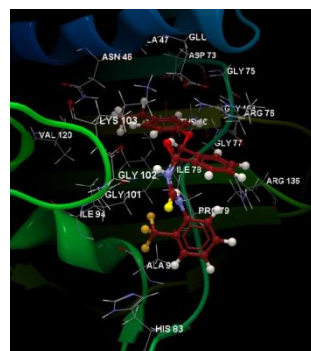

(v) Docking pose of the 5f interacting with residues in the binding site.

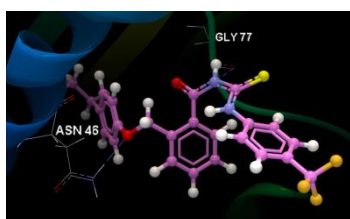

(x) Hydrogen bonds between the residues of the ASN 46, GLY 77 and the 5g ligand.

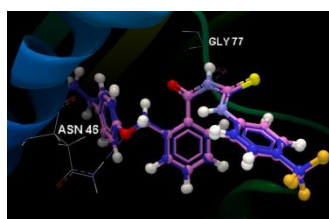

(y) Docking validation of 5g.

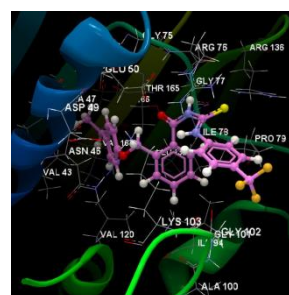

(z) Docking pose of the 5g interacting with residues in the binding site.

Figure S4. Molecular docking studies with 4DUH receptor.

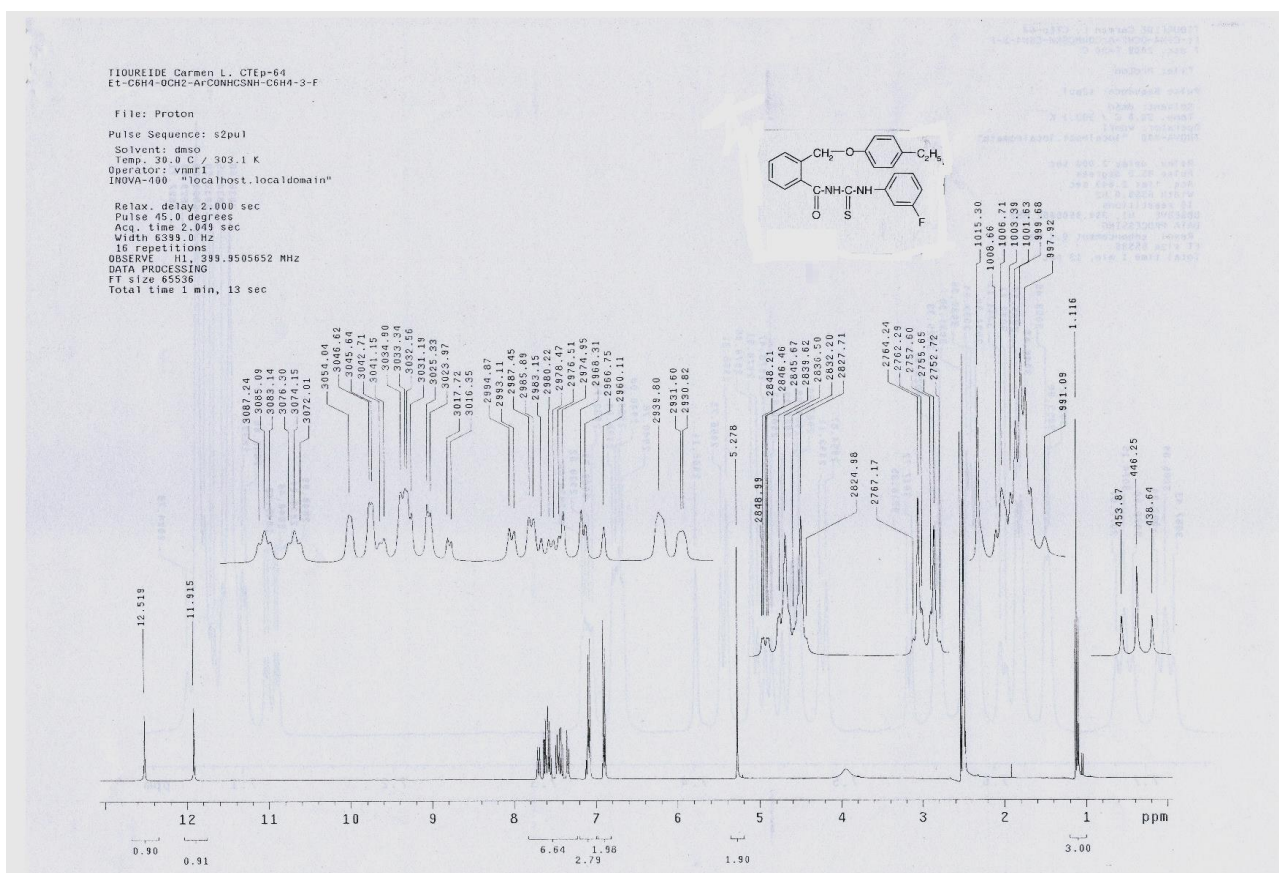

Figure S5. The  $^1\text{H-NMR}$  spectrum of 2-((4-Ethylphenoxy)methyl)-N-(3-fluorophenylcarbamothioyl)benzamide (5a).

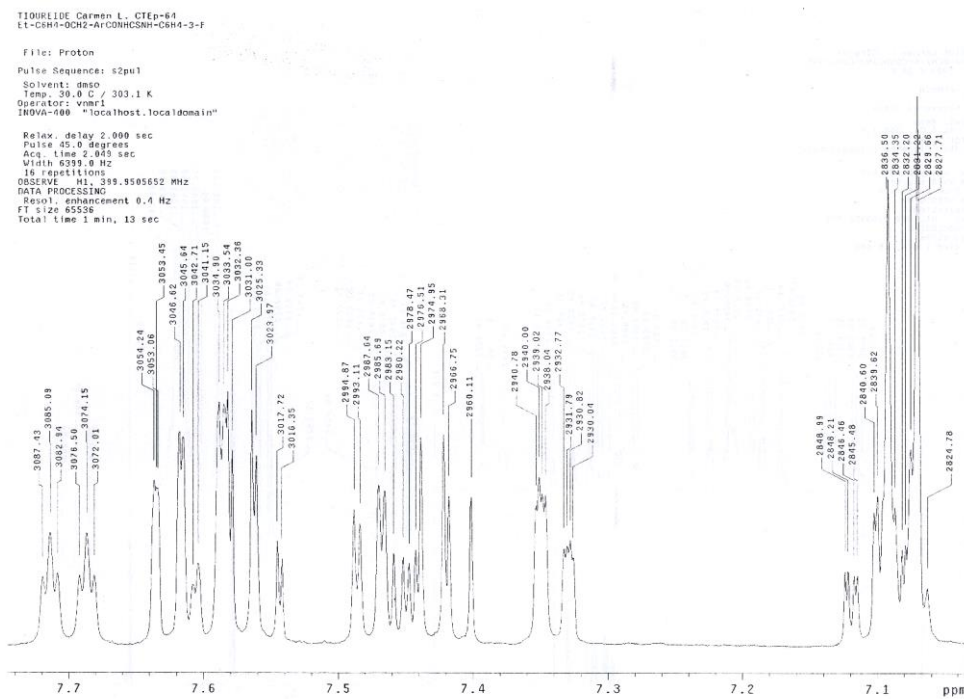

Figure S5. The  $^1\text{H-NMR}$  spectrum of 2-((4-Ethylphenoxy)methyl)-N-(3-fluorophenylcarbamothioyl)benzamide (5a).

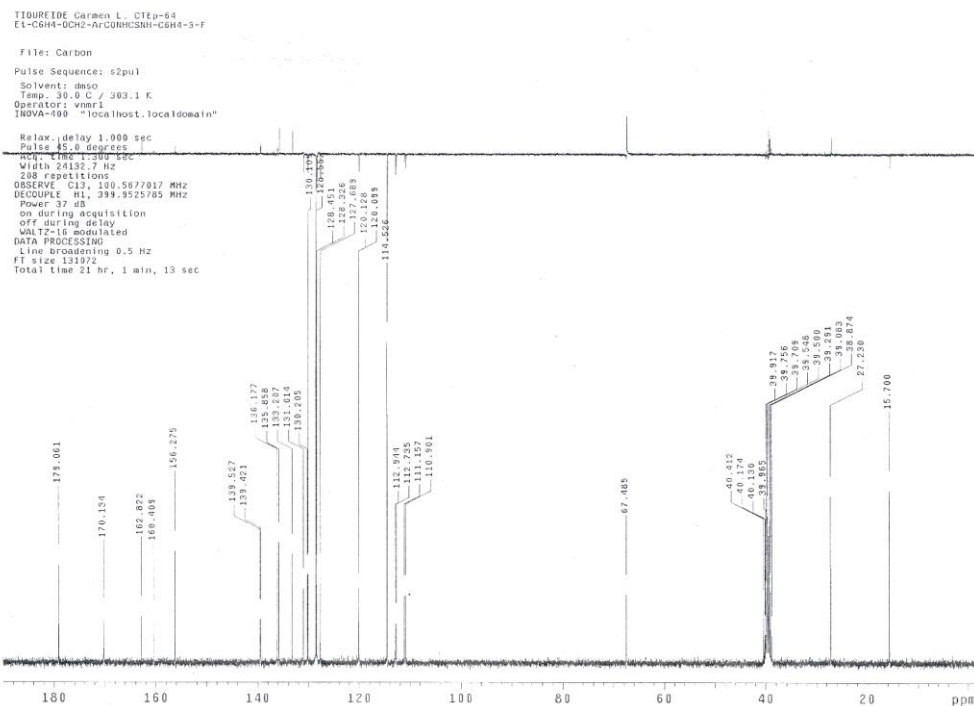

Figure S5. The  $^{13}\text{C}$ -NMR spectrum of 2-((4-Ethylphenoxy)methyl)-N-(3-fluorophenylcarbamothioyl)benzamide (5a).

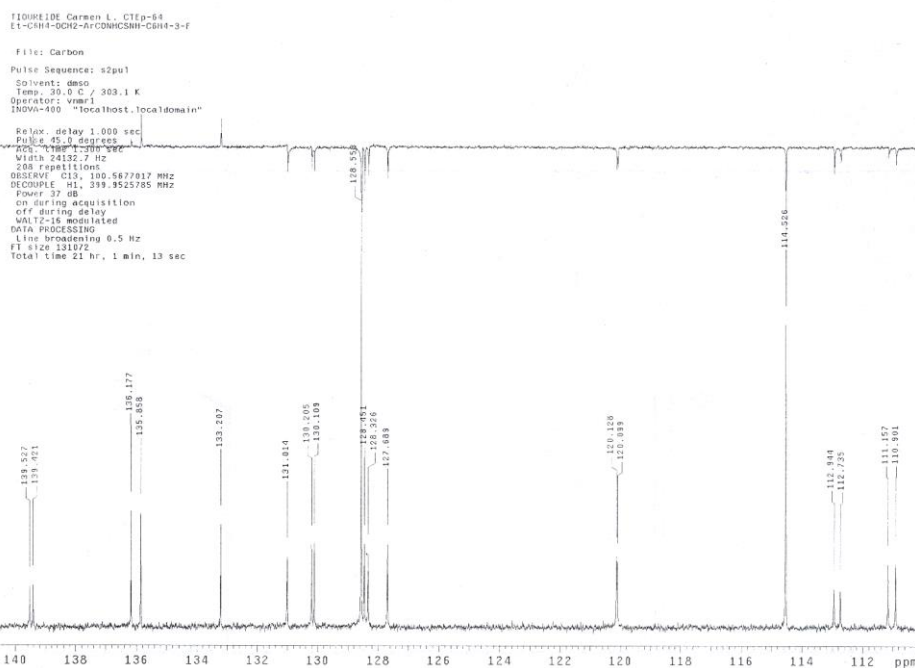

Figure S5. The  $^{13}\text{C}$ -NMR spectrum of 2-((4-Ethylphenoxy)methyl)-N-(3-fluorophenylcarbamothioyl)benzamide (5a).

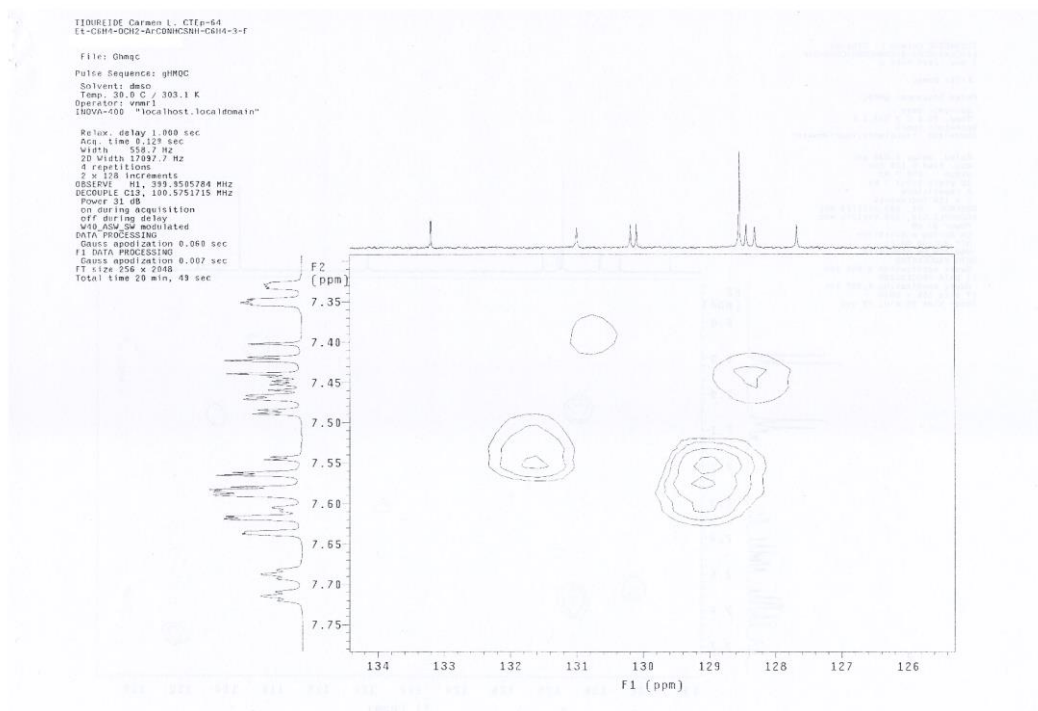

**Figure S5.** The gHMQC spectrum of 2-((4-Ethylphenoxy)methyl)-N-(3-fluorophenylcarbamothioyl)benzamide (**5a**).

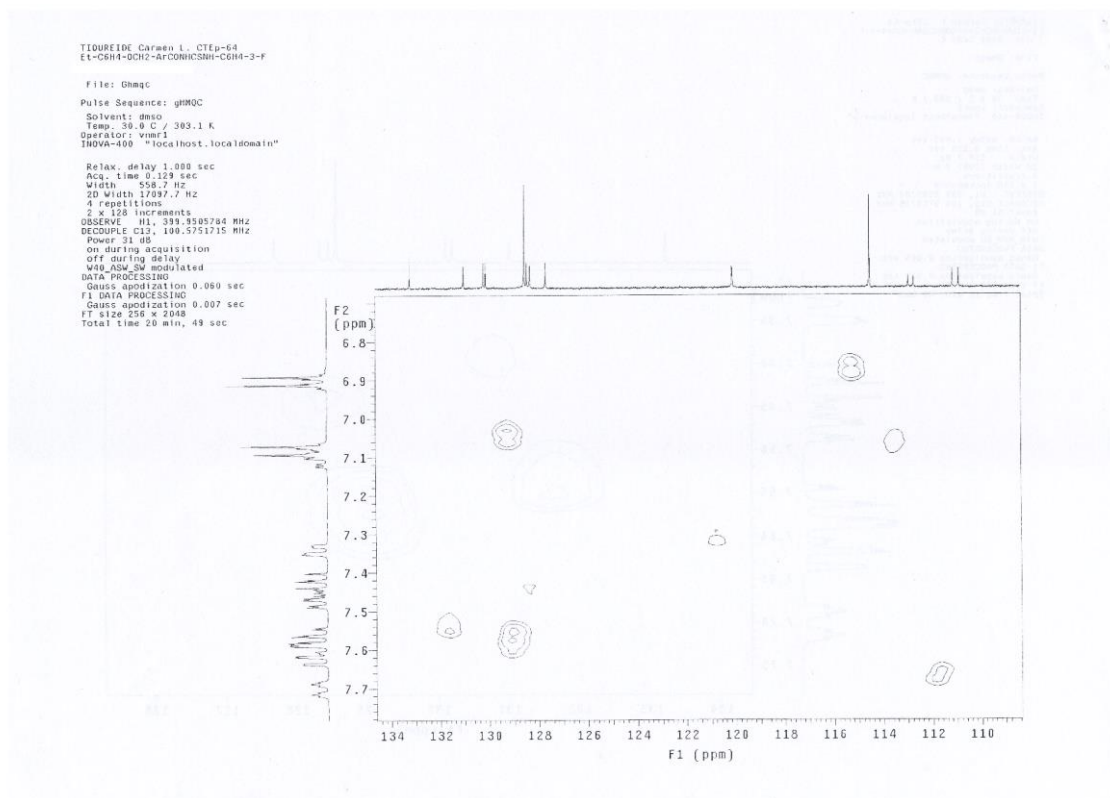

**Figure S5.** The gHMQC spectrum of 2-((4-Ethylphenoxy)methyl)-N-(3-fluorophenylcarbamothioyl)benzamide (**5a**).



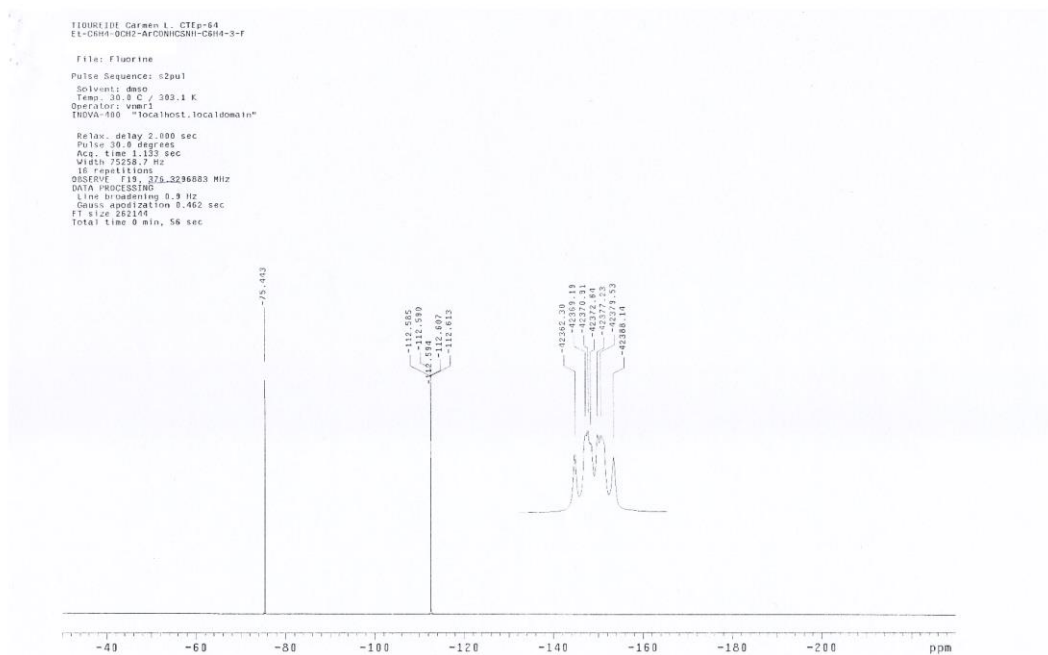

**Figure S5.** The  $^{19}\text{F}$  NMR spectrum of 2-((4-Ethylphenoxy)methyl)-N-(3-fluorophenylcarbamothioyl)benzamide (5a).

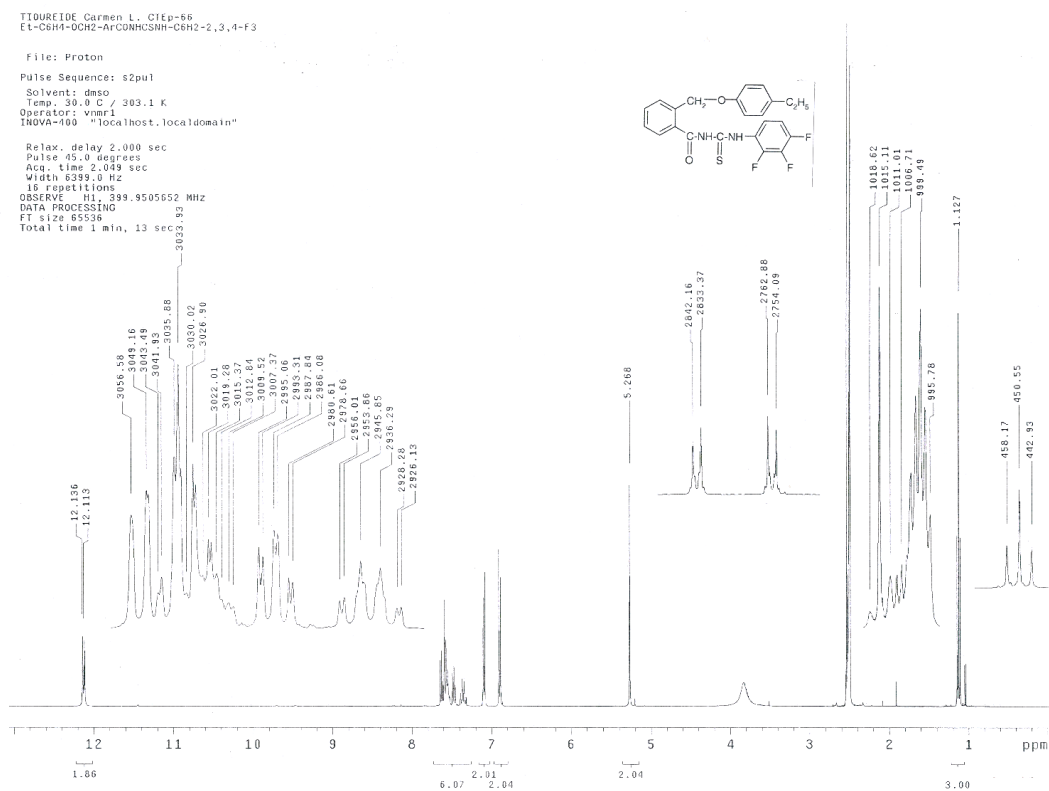

**Figure S6.** The  $^1\text{H}$ -NMR spectrum of 2-((4-Ethylphenoxy)methyl)-N-(2,3,4-trifluorophenylcarbamothioyl)benzamide (5b).



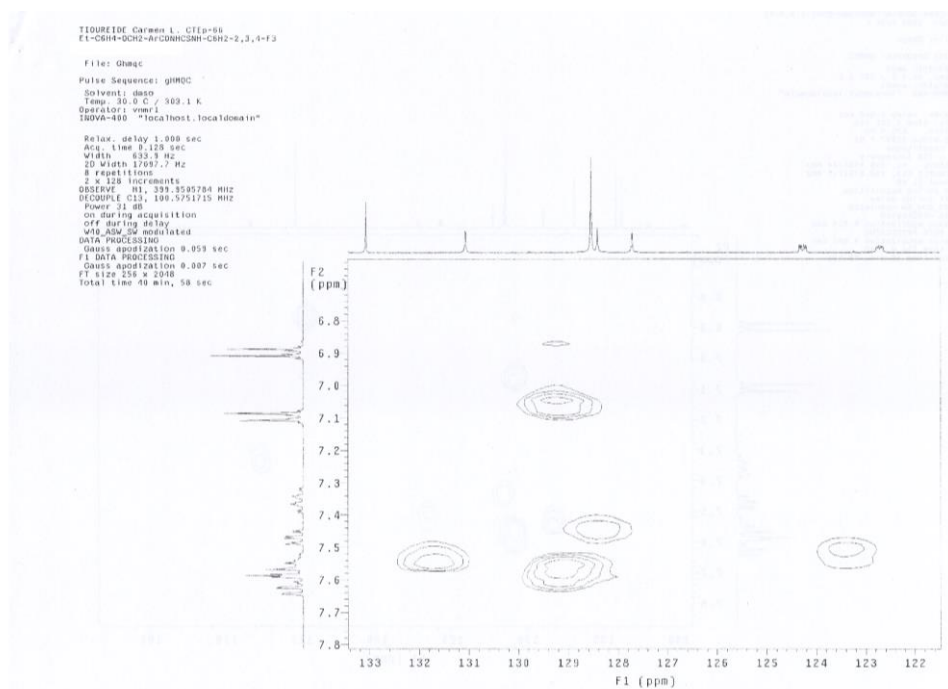

**Figure S6.** The gHMOC spectrum of 2-((4-Ethylphenoxy)methyl)-N-(2,3,4-trifluorophenylcarbamothioyl)benzamide (**5b**).

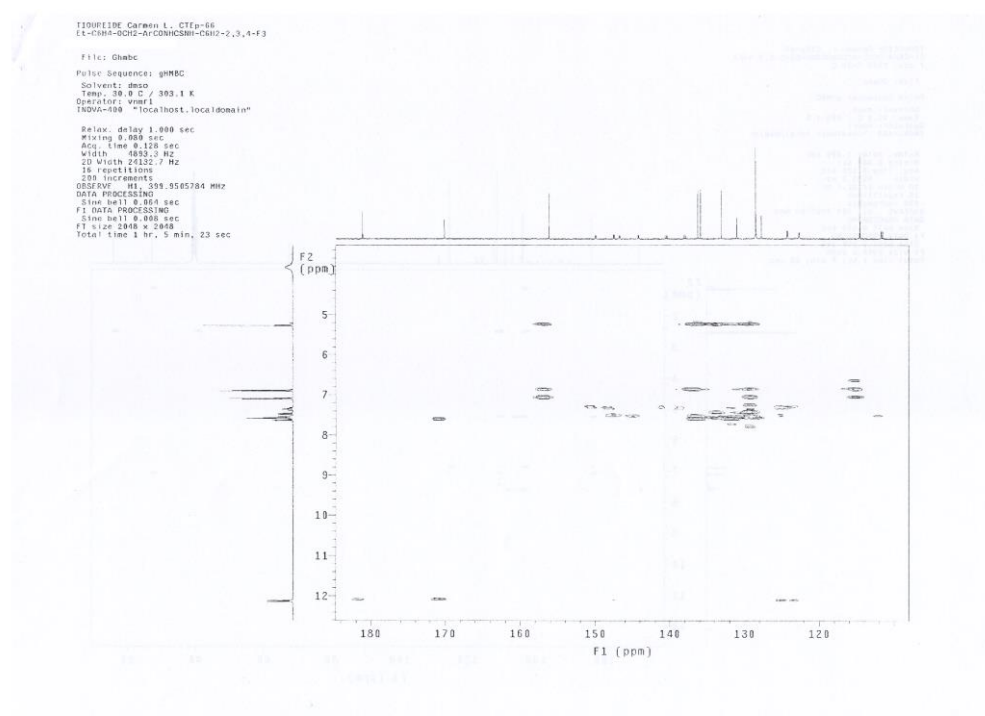

**Figure S6.** The gHMBC spectrum of 2-((4-Ethylphenoxy)methyl)-N-(2,3,4-trifluorophenylcarbamothioyl)benzamide (**5b**).





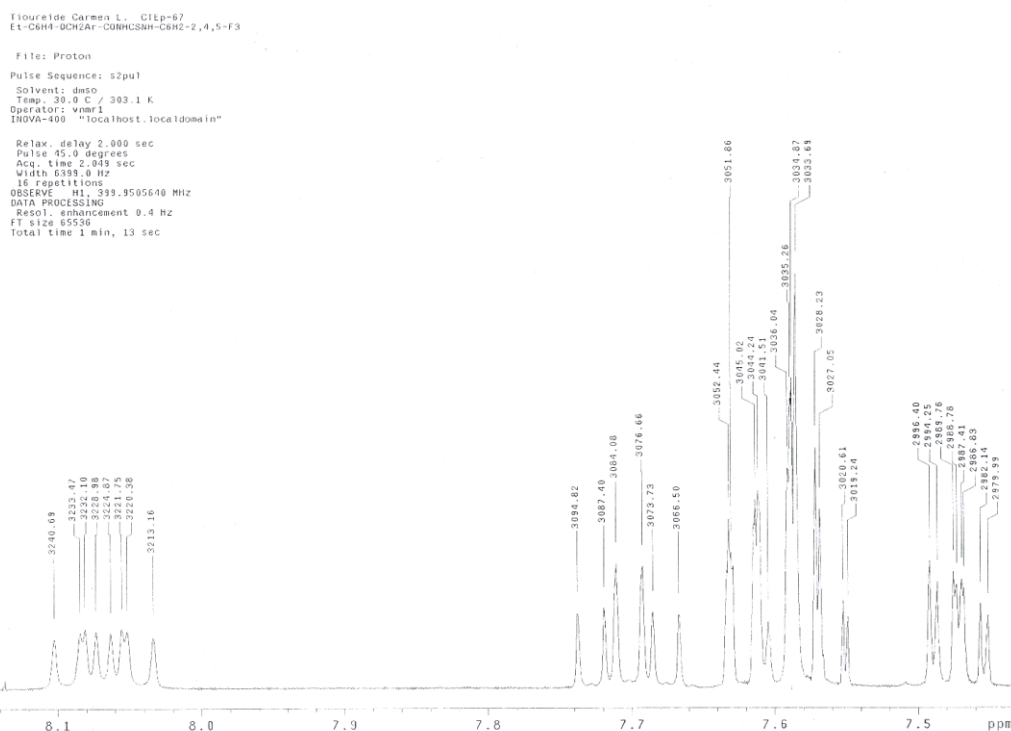

Figure S7. The  $^1\text{H-NMR}$  spectrum of 2-((4-Ethylphenoxy)methyl)-N-(2,4,5-trifluorophenylcarbamothioyl)benzamide (5c).

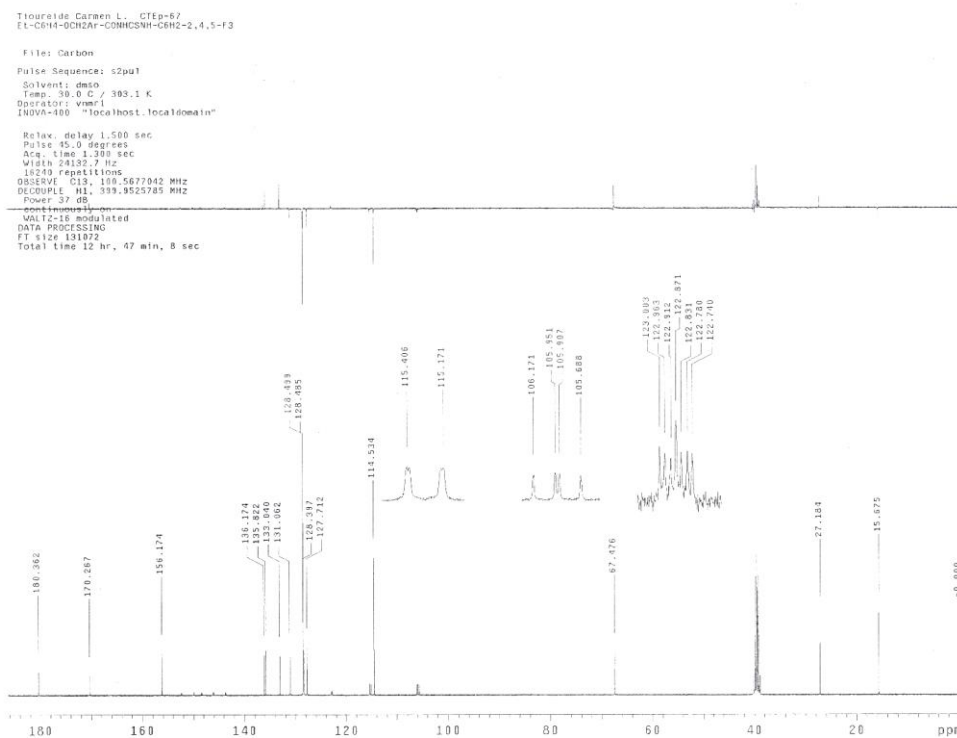

Figure S7. The  $^{13}\text{C-NMR}$  spectrum of 2-((4-Ethylphenoxy)methyl)-N-(2,4,5-trifluorophenylcarbamothioyl)benzamide (5c).

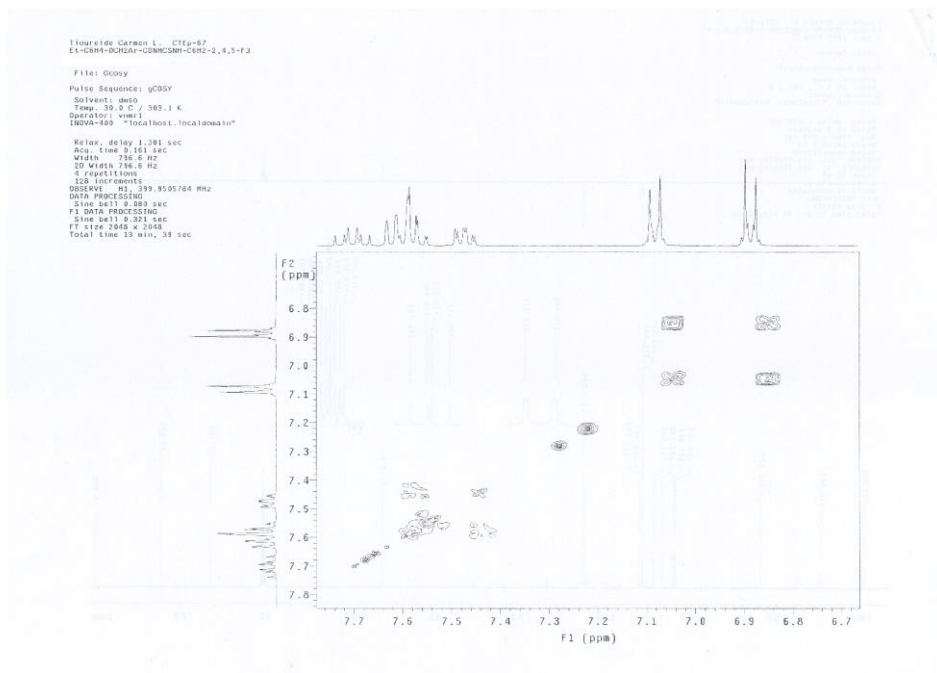

**Figure S7.** The gCOSY spectrum of 2-((4-Ethylphenoxy)methyl)-N-(2,4,5-trifluorophenylcarbamothioyl)benzamide (**5c**).

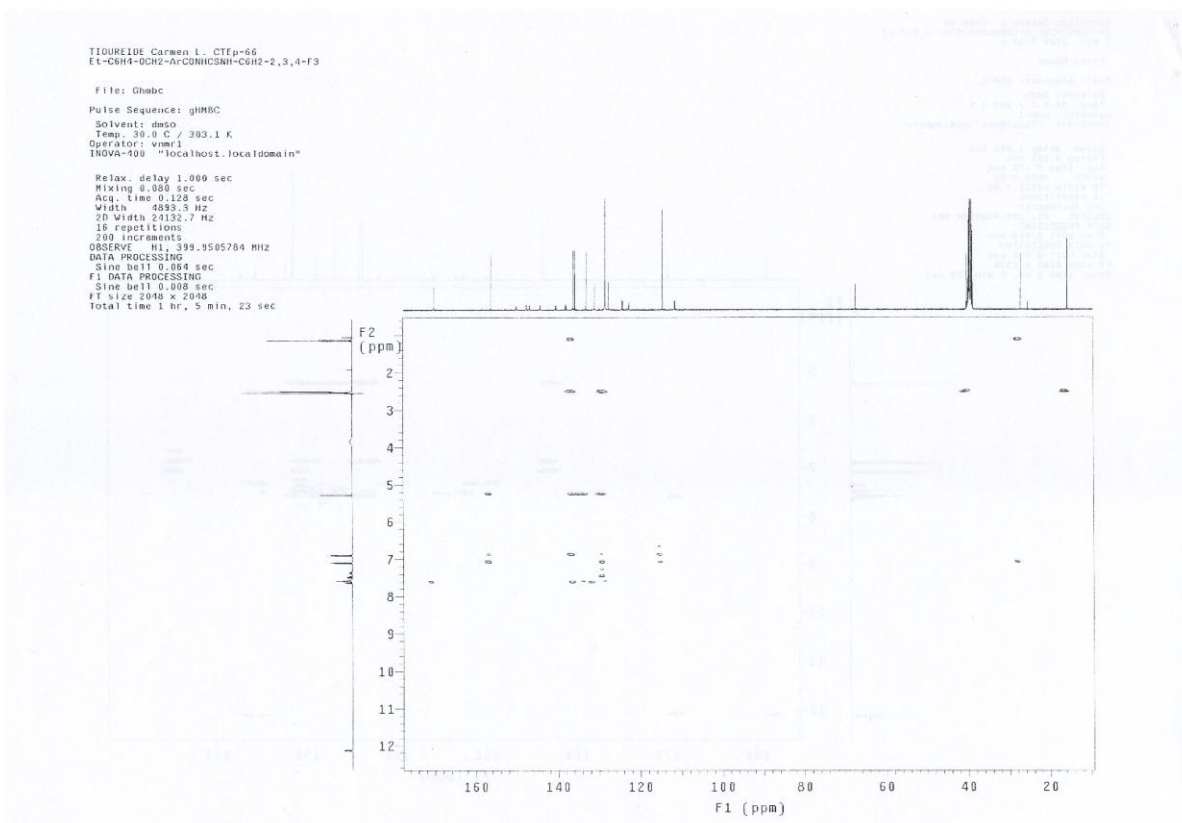

**Figure S7.** The gHMBC spectrum of 2-((4-Ethylphenoxy)methyl)-N-(2,4,5-trifluorophenylcarbamothioyl)benzamide (**5d**).

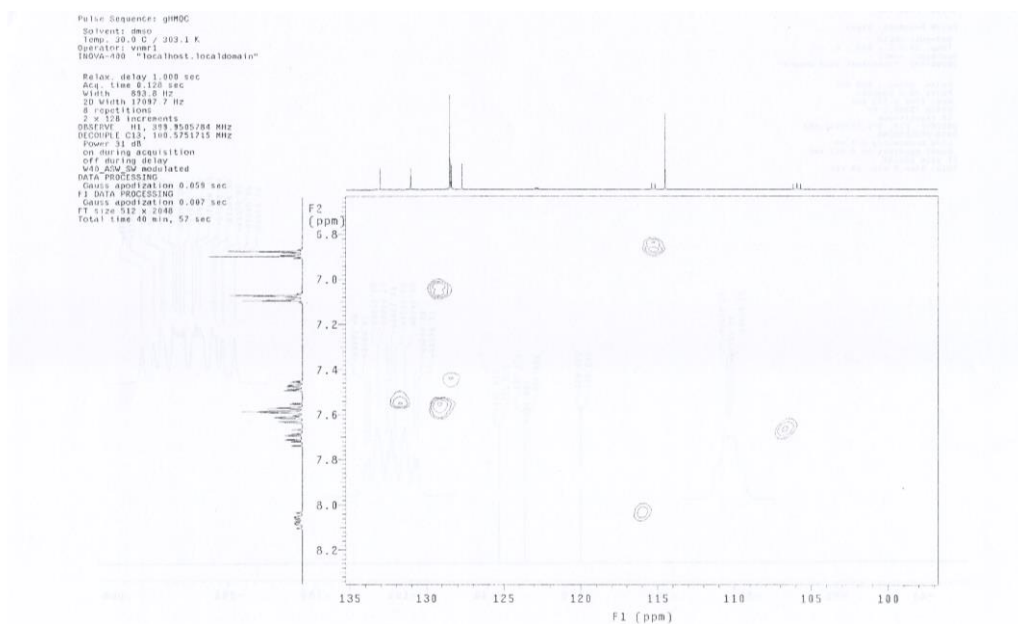

**Figure S7.** The gHMOC spectrum of 2-((4-Ethylphenoxy)methyl)-N-(2,4,5-trifluorophenylcarbamothioyl)benzamide (**5d**).

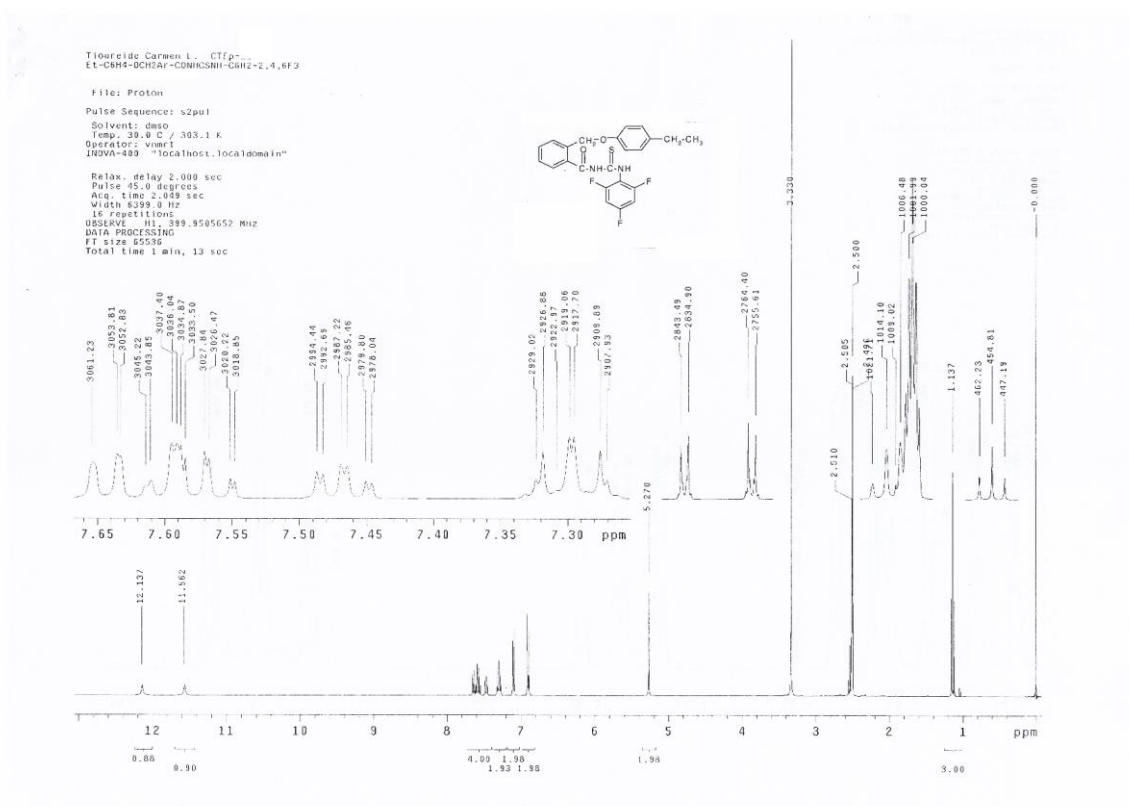

**Figure S8.** The  $^1\text{H-NMR}$  spectrum of 2-((4-Ethylphenoxy)methyl)-N-(2,4,6-trifluorophenylcarbamothioyl)benzamide (**5d**).

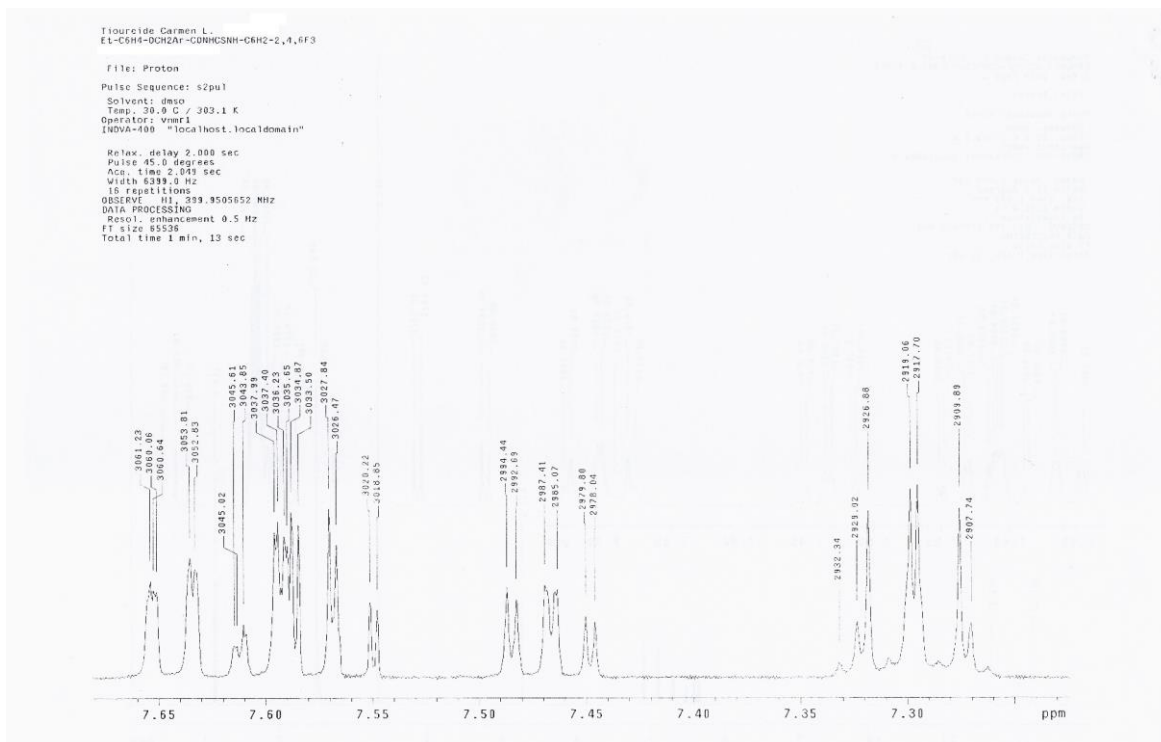

**Figure S8.** The  $^1\text{H-NMR}$  spectrum of 2-((4-Ethylphenoxy)methyl)-N-(2,4,6-trifluorophenylcarbamothioyl)benzamide (**5d**).

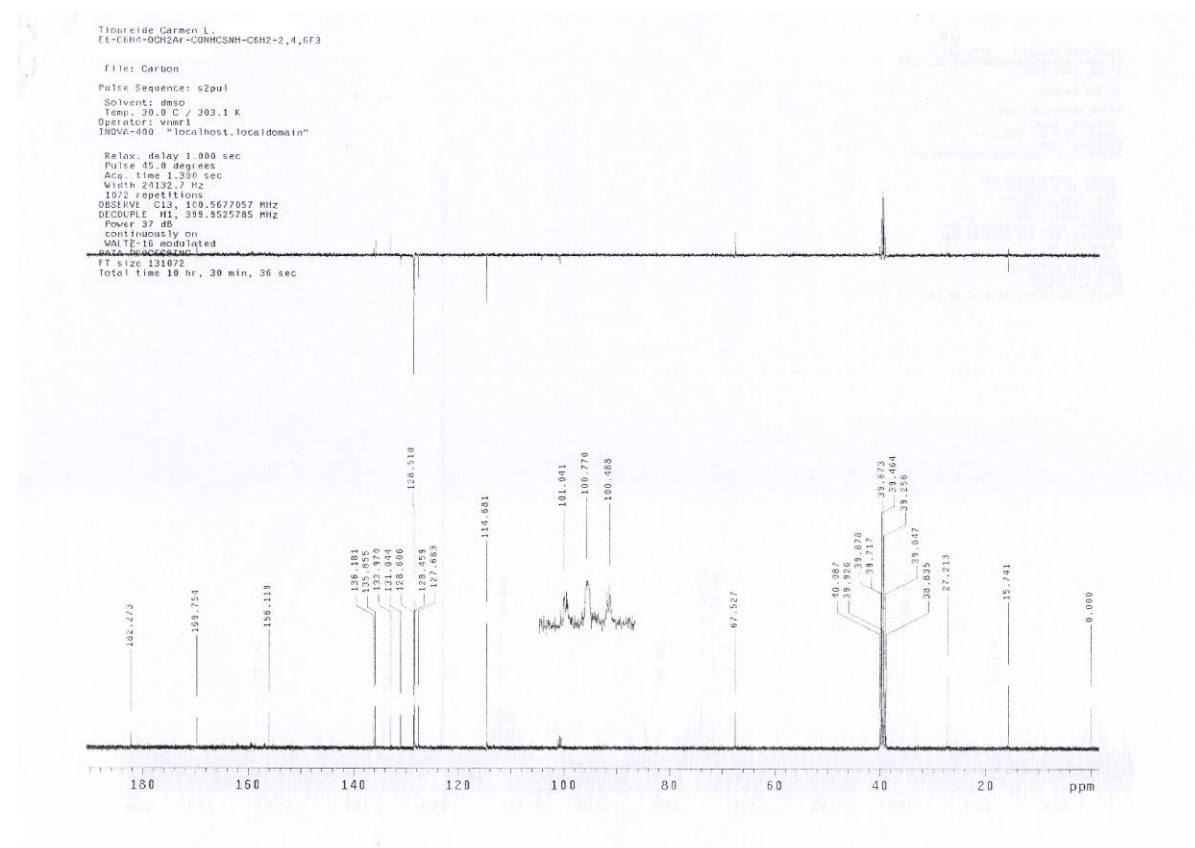

**Figure S8.** The  $^{13}\text{C-NMR}$  spectrum of 2-((4-Ethylphenoxy)methyl)-N-(2,4,6-trifluorophenylcarbamothioyl)benzamide (**5d**).







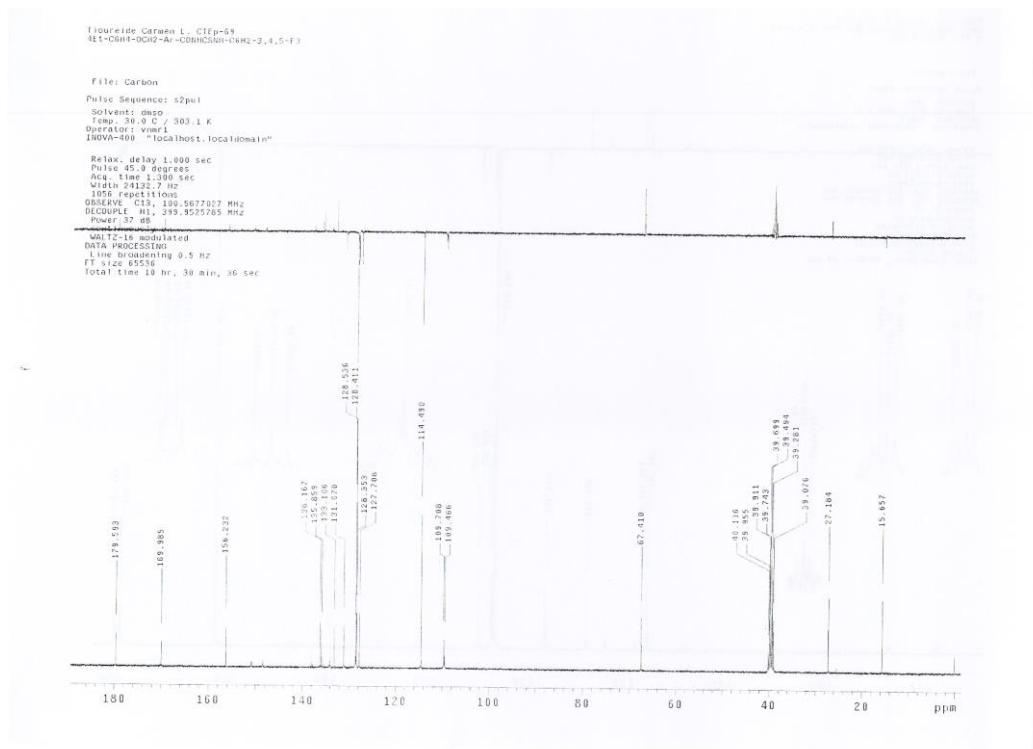

**Figure S9.** The  $^{13}\text{C}$ -NMR spectrum of 2-((4-Ethylphenoxy)methyl)-N-(3,4,5-trifluorophenylcarbamothioyl)benzamide (**5e**).

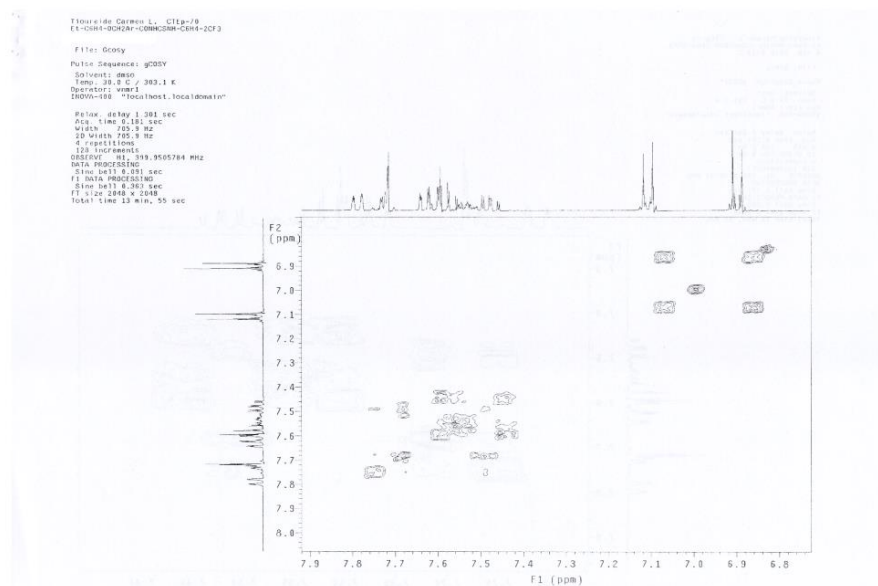

**Figure S9.** The gCOSY spectrum of 2-((4-Ethylphenoxy)methyl)-N-(3,4,5-trifluorophenylcarbamothioyl)benzamide (**5e**).

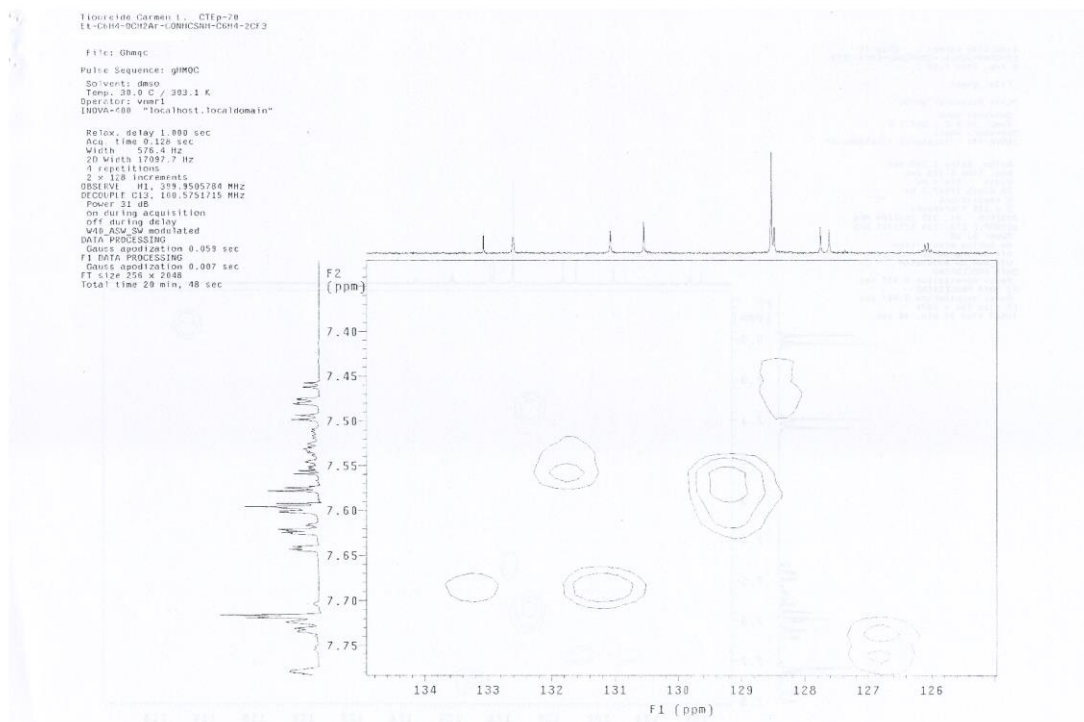

**Figure S9.** The gHMQC spectrum of 2-((4-Ethylphenoxy)methyl)-N-(3,4,5-trifluorophenylcarbamothioyl)benzamide (**5e**).

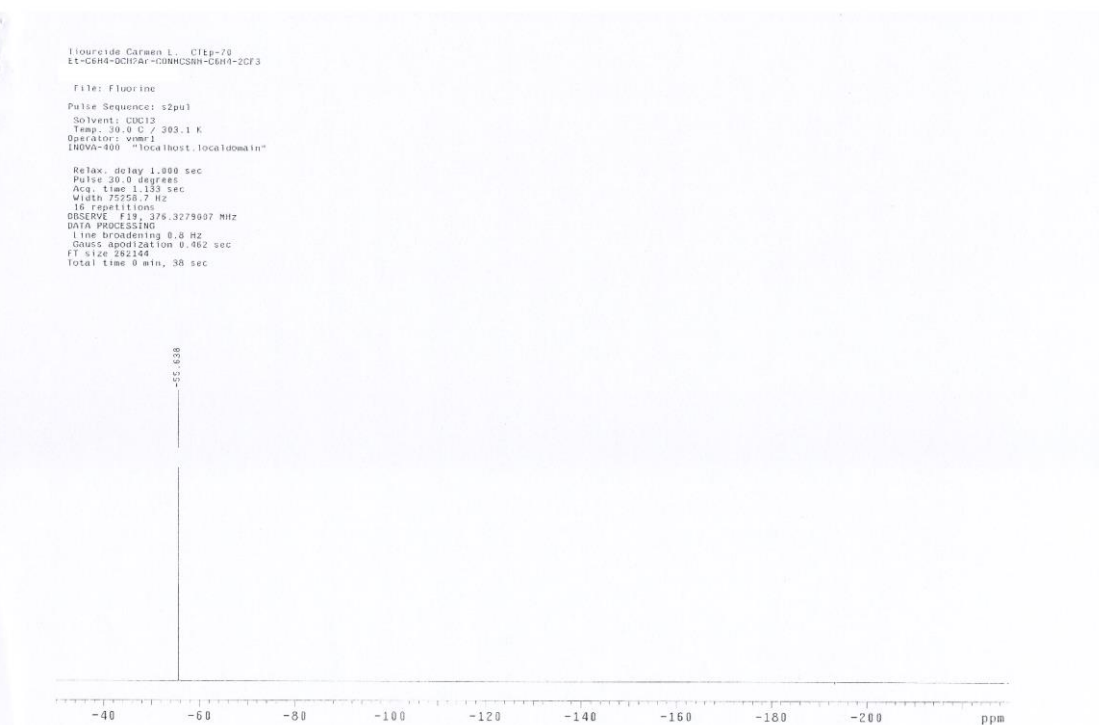

**Figure S9.** The  $^{19}\text{F}$  NMR spectrum of 2-((4-Ethylphenoxy)methyl)-N-(3,4,5-trifluorophenylcarbamothioyl)benzamide (**5e**).







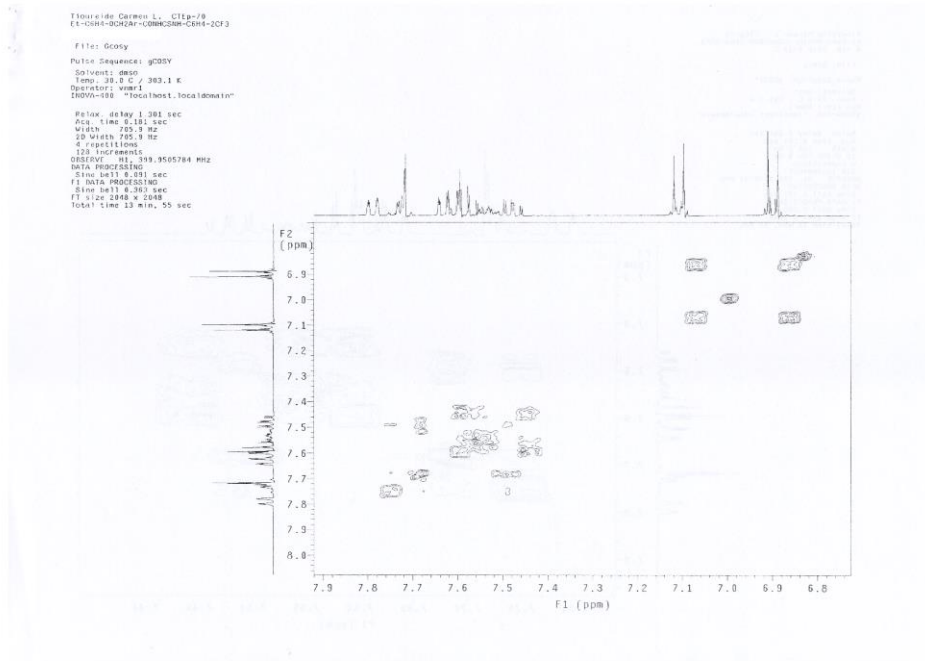

**Figure S10.** The gCOSY spectrum of 2-((4-Ethylphenoxy)methyl)-N-(2-trifluoromethylphenylcarbamothioyl)benzamide (**5f**).

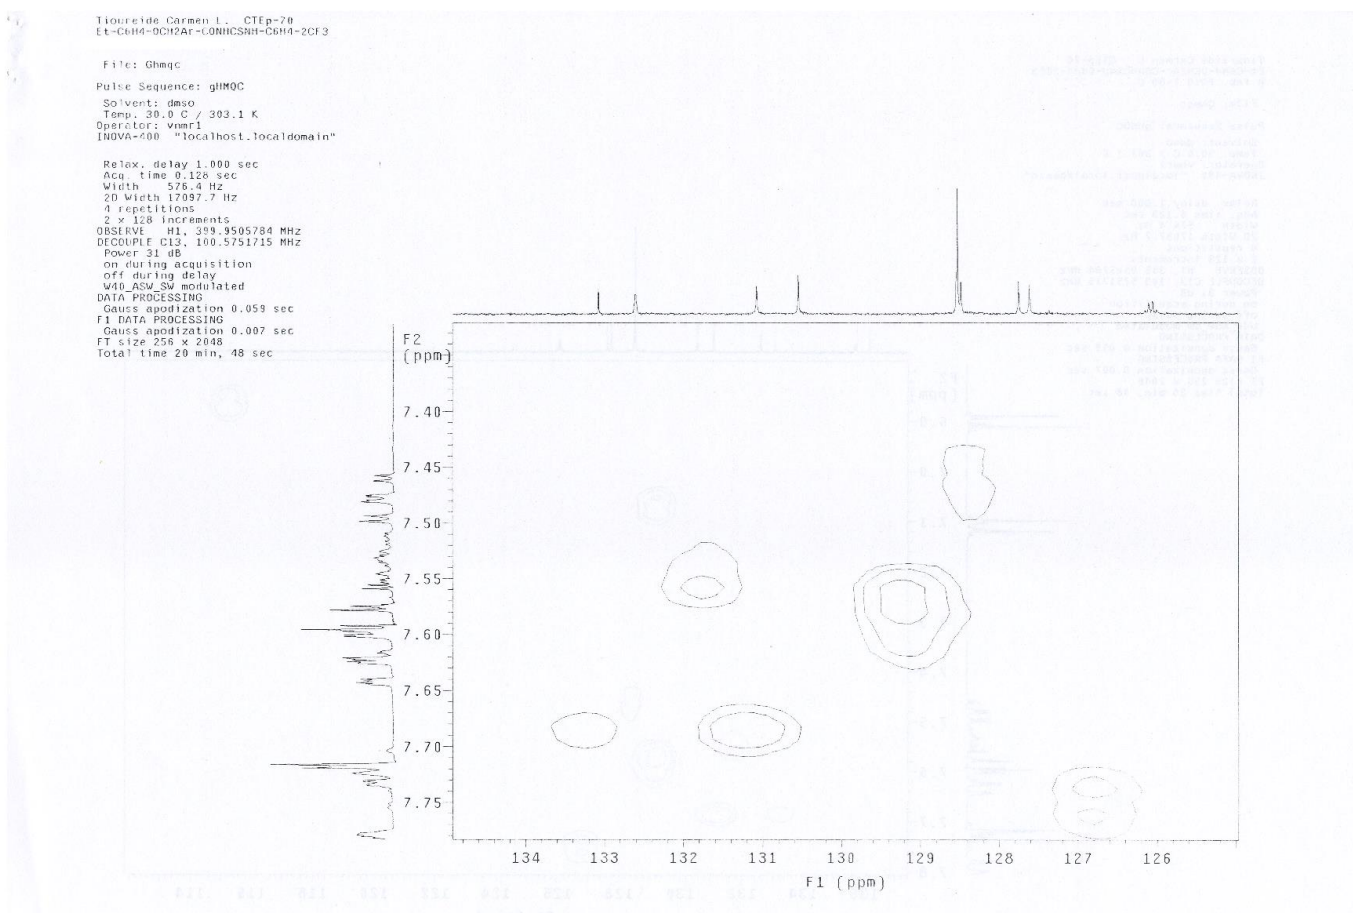

**Figure S10.** The gHMOC spectrum of 2-((4-Ethylphenoxy)methyl)-N-(2-trifluoromethylphenylcarbamothioyl)benzamide (**5f**).

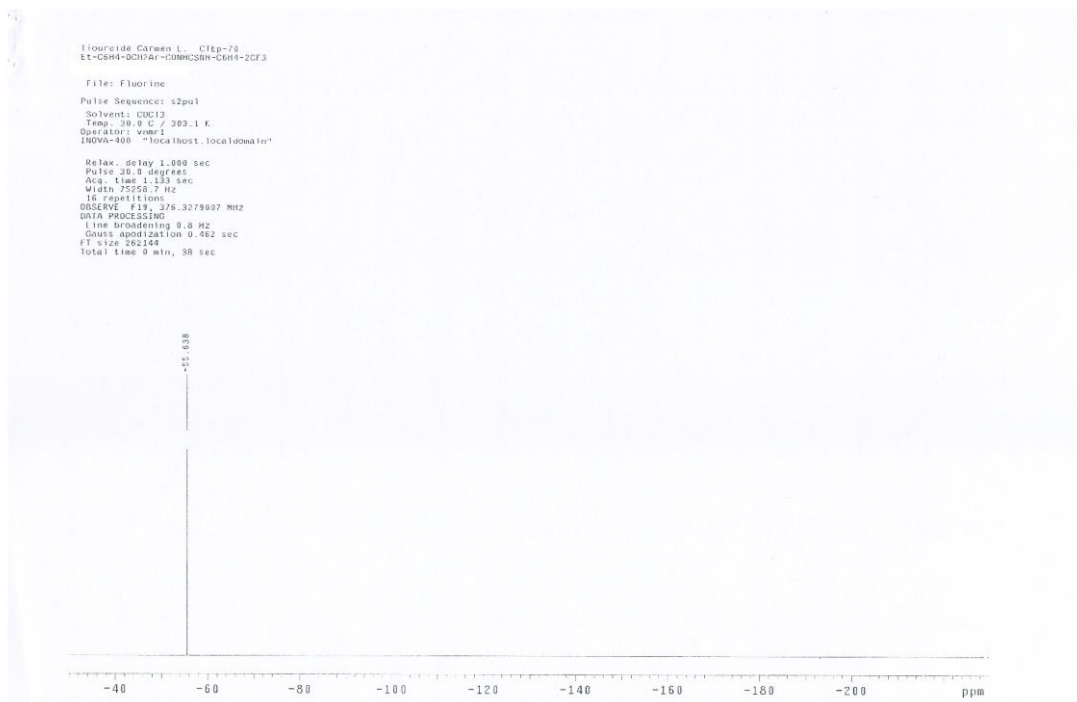

**Figure S10.** The  $^{19}\text{F}$  NMR spectrum of 2-((4-Ethylphenoxy)methyl)-N-(2-trifluoromethylphenylcarbamothioyl)benzamide (**5f**).

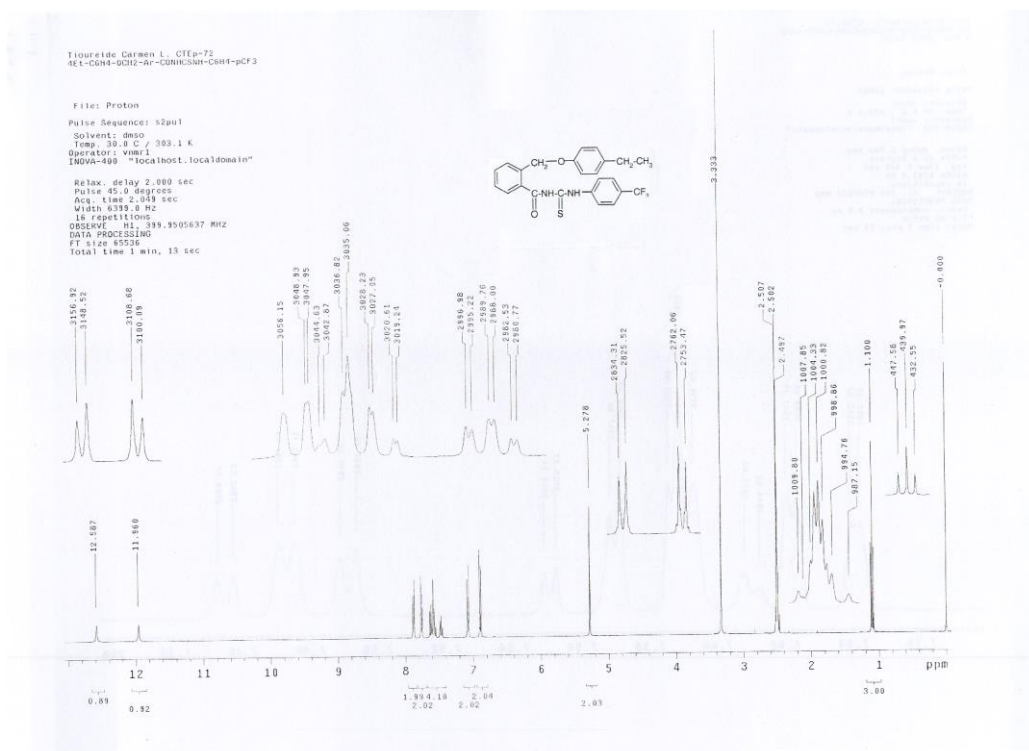

**Figure S11.** The  $^1\text{H}$ -NMR spectrum of 2-((4-Ethylphenoxy)methyl)-N-(4-trifluoromethylphenylcarbamothioyl)benzamide (**5g**).



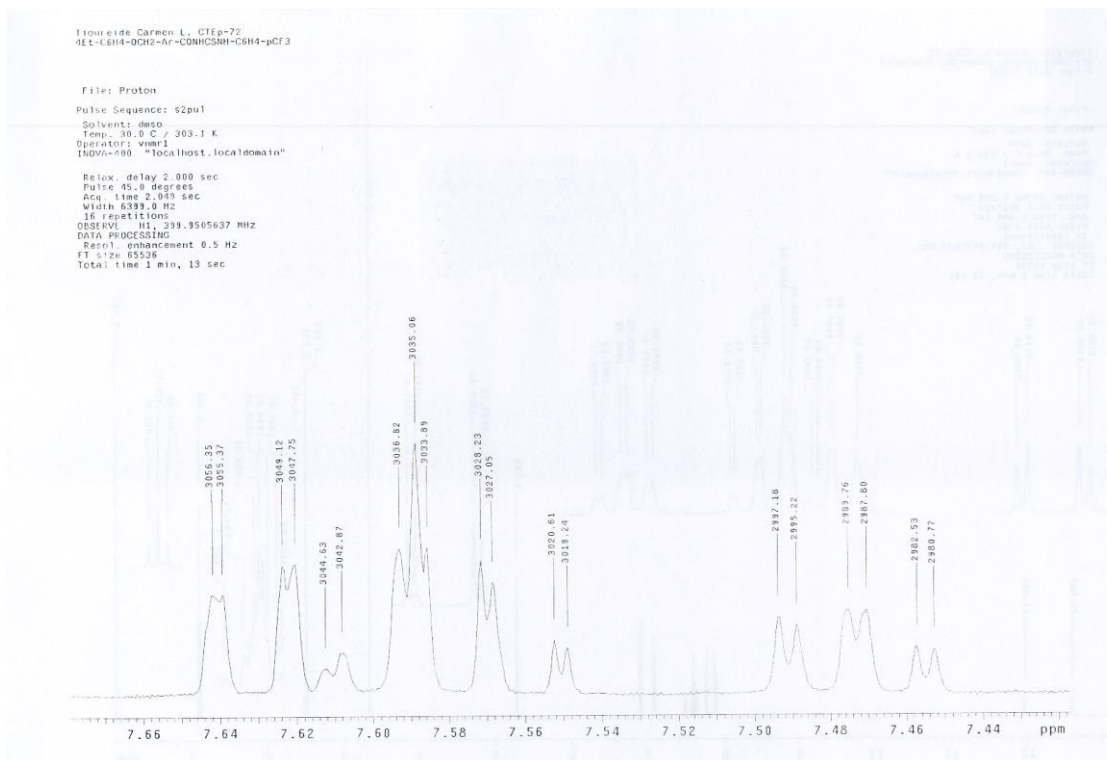

**Figure S11.** The  $^1\text{H-NMR}$  spectrum of 2-((4-Ethylphenoxy)methyl)-N-(4-trifluoromethylphenylcarbamothioyl)benzamide (**5g**).

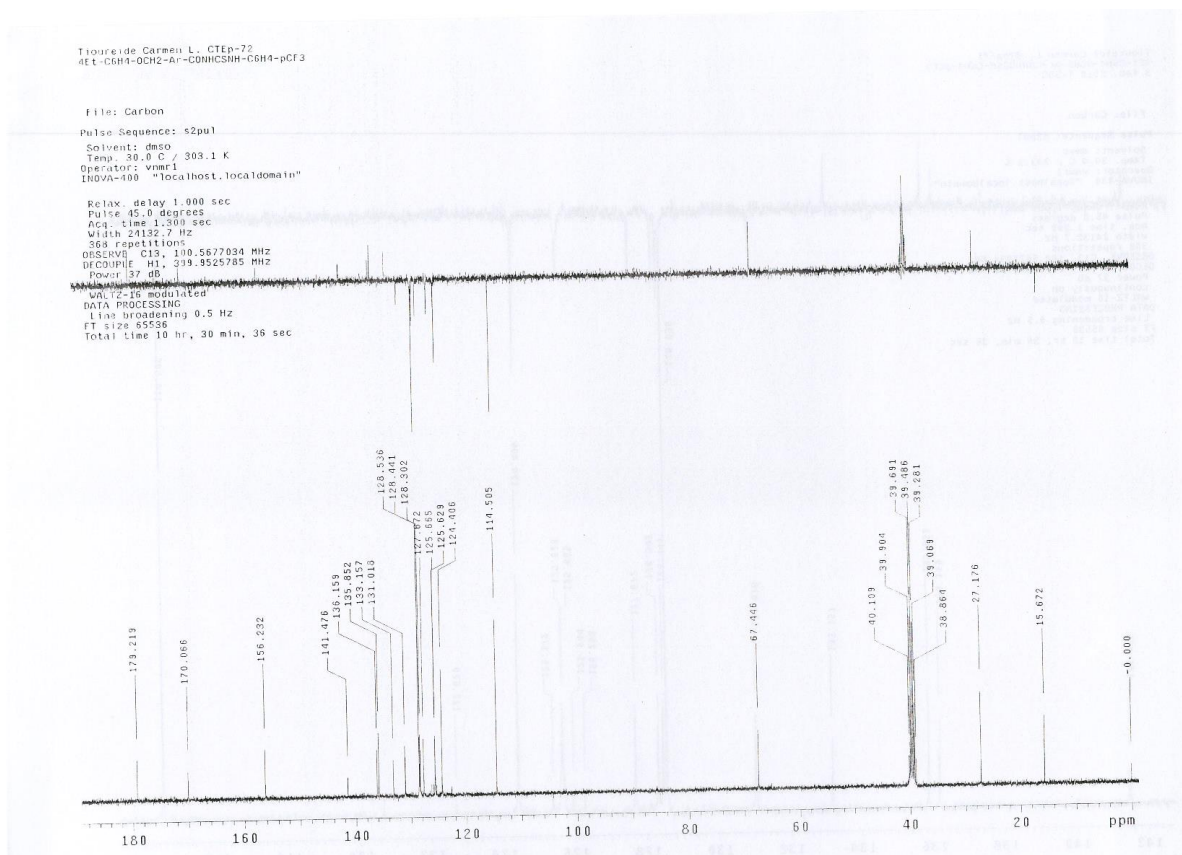

**Figure S11.** The  $^{13}\text{C-NMR}$  spectrum of 2-((4-Ethylphenoxy)methyl)-N-(4-trifluoromethylphenylcarbamothioyl)benzamide (**5g**).

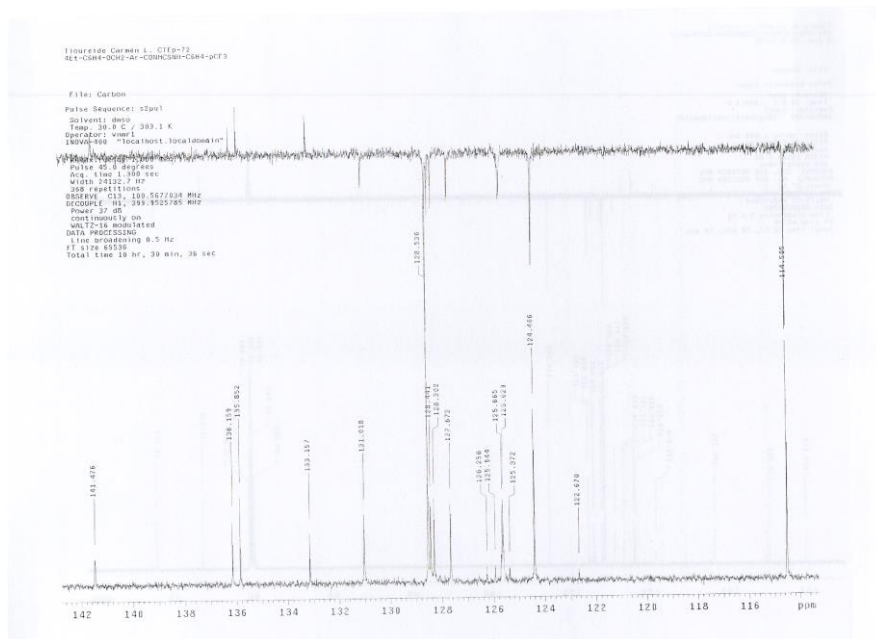

**Figure S11.** The  $^{13}\text{C}$ -NMR spectrum of 2-((4-Ethylphenoxy)methyl)-N-(4-trifluoromethylphenylcarbamothioyl)benzamide (**5g**).

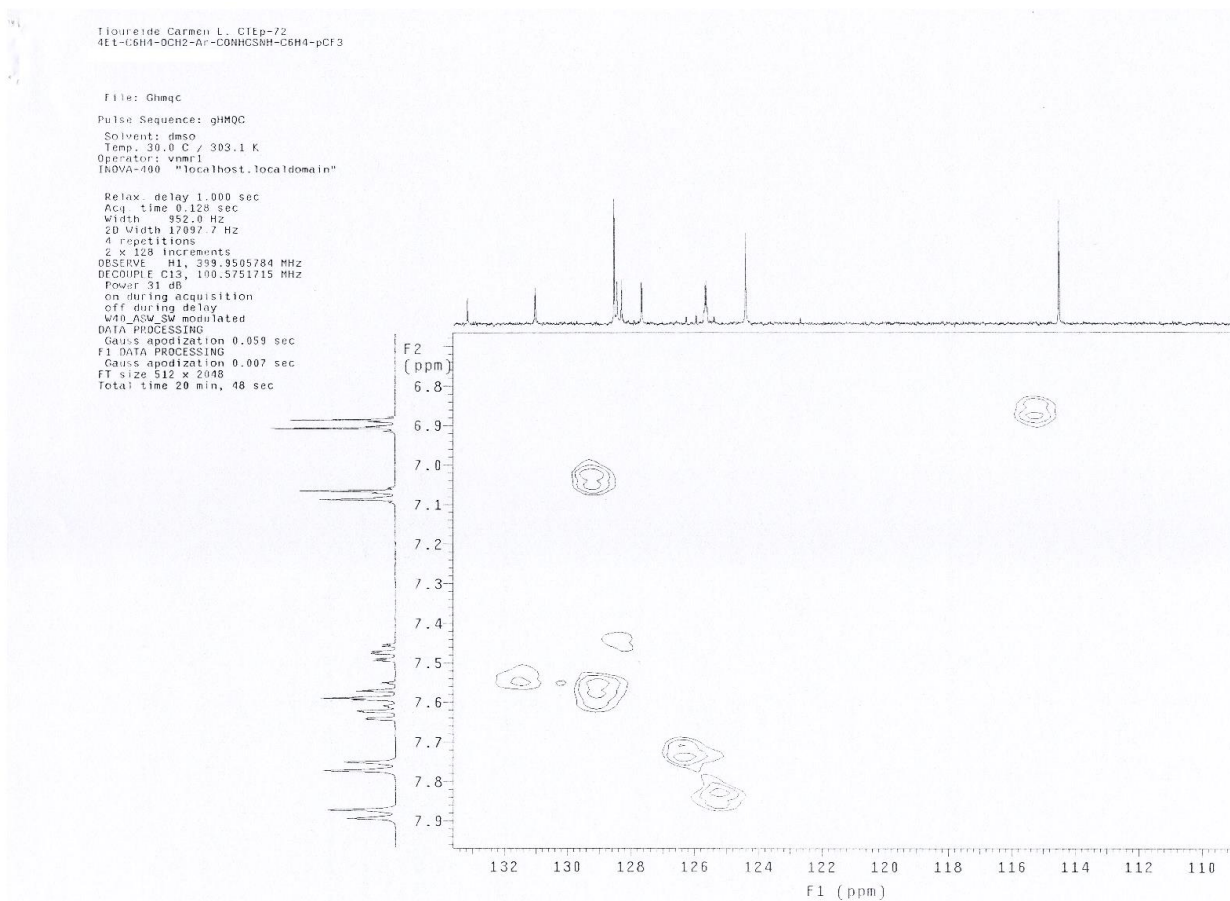

**Figure S11.** The gHMQC spectrum of 2-((4-Ethylphenoxy)methyl)-N-(4-trifluoromethylphenylcarbamothioyl)benzamide (**5g**).

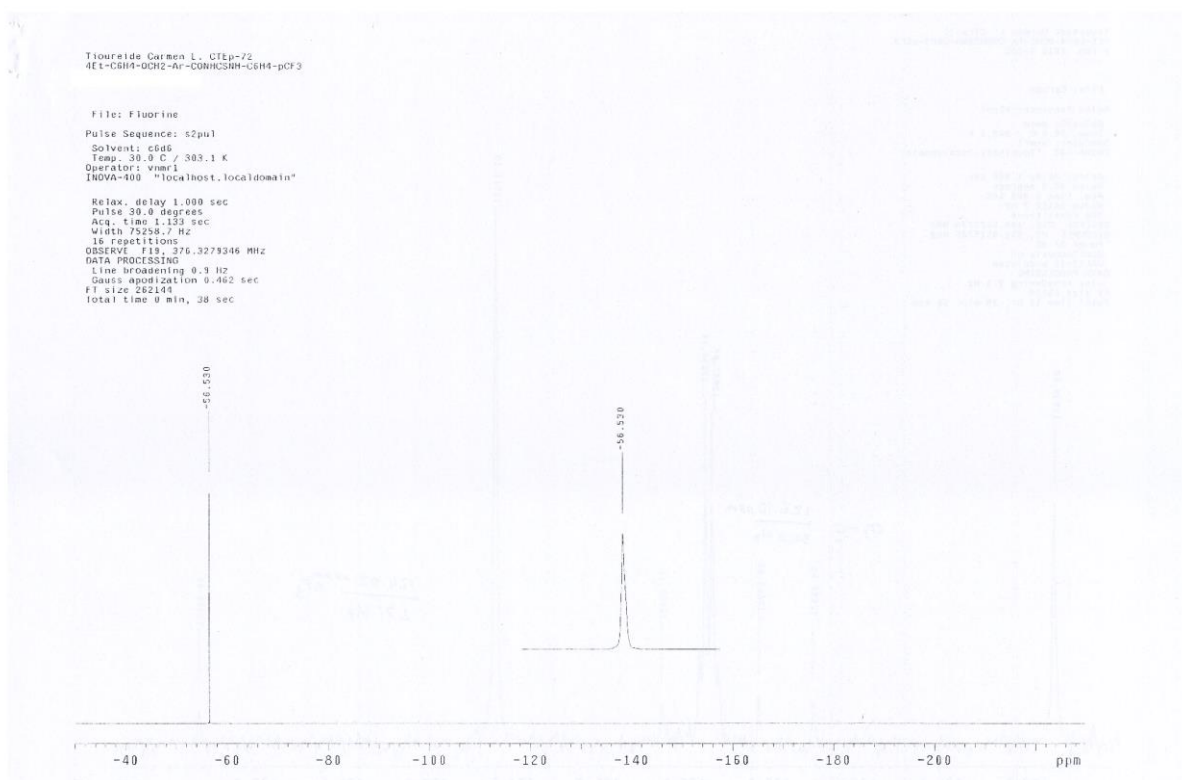

**Figure S11.** The  $^{19}\text{F}$  NMR spectrum of 2-((4-Ethylphenoxy)methyl)-N-(4-trifluoromethylphenyl)carbamothioylbenzamide (**5g**).

**Table S1.** Crystallographic data for **5d**.

| <b>Compound 5d</b>                                |                                                                                |
|---------------------------------------------------|--------------------------------------------------------------------------------|
| Empirical formula                                 | C <sub>23</sub> H <sub>19</sub> F <sub>3</sub> N <sub>2</sub> O <sub>2</sub> S |
| M                                                 | 444.47                                                                         |
| T(K)                                              | 293                                                                            |
| $\lambda$ (nm)                                    | 0.71075                                                                        |
| Crystal size (mm)                                 | 0.400 X 0.350 X 0.200                                                          |
| Crystal color                                     | colourless                                                                     |
| Crystal system                                    | Triclinic                                                                      |
| Space group                                       | P-1 (#2)                                                                       |
| <i>a</i> (Å)                                      | 7.1369(2)                                                                      |
| <i>b</i> (Å)                                      | 11.8876(3)                                                                     |
| <i>c</i> (Å)                                      | 13.4640(9)                                                                     |
| $\alpha$ (°)                                      | 102.869(7)                                                                     |
| $\beta$ (°)                                       | 91.557(6)                                                                      |
| $\gamma$ (°)                                      | 104.241(7)                                                                     |
| <i>V</i> (Å <sup>3</sup> )                        | 1075.31(10)                                                                    |
| <i>Z</i>                                          | 2                                                                              |
| Calculated density (g.cm <sup>-3</sup> )          | 1.373                                                                          |
| $\mu$ (MoK $\alpha$ ) (cm <sup>-1</sup> )         | 1.983                                                                          |
| <i>F</i> (000)                                    | 460.00                                                                         |
| Reflections                                       |                                                                                |
| collected/unique                                  | 15071/4927 ( <i>R</i> <sub>int</sub> = 0.0251)                                 |
| No. observations (All reflections)                | 4927                                                                           |
| No. variables                                     | 288                                                                            |
| Goodness-of-fit                                   | 1.133                                                                          |
| Final <i>R</i> indices [ <i>I</i> >2 $\sigma$ ]   | 0.0435                                                                         |
| <i>R</i> indices (all data) <i>R</i> 1            | 0.0776                                                                         |
| <i>wR</i> 2                                       | 0.1530                                                                         |
| Largest diff. peak and hole (e-/Å <sup>-3</sup> ) | 0.29 and -0.36                                                                 |

**Table S2.** Selected bond lengths (Å) for **5d**.

| <b>atom.</b> | <b>atom</b> | <b>distance</b> | <b>atom</b> | <b>atom</b> | <b>distance</b> |
|--------------|-------------|-----------------|-------------|-------------|-----------------|
| S1           | C17         | 1.653(2)        | F1          | C23         | 1.345(2)        |
| F2           | C21         | 1.357(4)        | F3          | C19         | 1.344(3)        |
| O1           | C6          | 1.383(3)        | O1          | C9          | 1.434(3)        |
| O2           | C16         | 1.220(2)        | N1          | C16         | 1.375(3)        |
| N1           | C17         | 1.385(3)        | N2          | C17         | 1.339(2)        |
| N2           | C18         | 1.419(3)        | C1          | C2          | 1.473(5)        |
| C2           | C3          | 1.537(4)        | C3          | C4          | 1.384(3)        |
| C3           | C8          | 1.387(4)        | C4          | C5          | 1.387(4)        |
| C5           | C6          | 1.381(3)        | C6          | C7          | 1.379(3)        |
| C7           | C8          | 1.396(4)        | C9          | C10         | 1.498(3)        |
| C10          | C11         | 1.398(3)        | C10         | C15         | 1.385(4)        |
| C11          | C12         | 1.393(3)        | C11         | C16         | 1.496(3)        |
| C12          | C13         | 1.386(4)        | C13         | C14         | 1.374(5)        |
| C14          | C15         | 1.374(4)        | C18         | C19         | 1.380(3)        |
| C18          | C23         | 1.370(3)        | C19         | C20         | 1.368(4)        |
| C20          | C21         | 1.362(4)        | C21         | C22         | 1.359(4)        |
| C22          | C23         | 1.375(4)        |             |             |                 |

**Table S3.** Selected bond lengths (Å) and angles (°) for **5d**.

| atom. | atom | atom | angle      | atom | atom | atom | angle      |
|-------|------|------|------------|------|------|------|------------|
| C6    | O1   | C9   | 116.91(15) | C16  | N1   | C17  | 128.47(16) |
| C17   | N2   | C18  | 123.09(18) | C1   | C2   | C3   | 113.2(2)   |
| C2    | C3   | C4   | 121.9(3)   | C2   | C3   | C8   | 121.3(2)   |
| C4    | C3   | C8   | 116.8(2)   | C3   | C4   | C5   | 122.2(3)   |
| C4    | C5   | C6   | 119.7(2)   | O1   | C6   | C5   | 116.02(18) |
| O1    | C6   | C7   | 124.2(2)   | C5   | C6   | C7   | 119.8(2)   |
| C6    | C7   | C8   | 119.3(3)   | C3   | C8   | C7   | 122.1(2)   |
| O1    | C9   | C10  | 108.86(18) | C9   | C10  | C11  | 121.5(2)   |
| C9    | C10  | C15  | 120.2(2)   | C11  | C10  | C15  | 118.2(2)   |
| C10   | C11  | C12  | 120.2(2)   | C10  | C11  | C16  | 120.69(18) |
| C12   | C11  | C16  | 119.0(2)   | C11  | C12  | C13  | 120.1(2)   |
| C12   | C13  | C14  | 119.5(3)   | C13  | C14  | C15  | 120.5(3)   |
| C10   | C15  | C14  | 121.4(3)   | O2   | C16  | N1   | 122.7(2)   |
| O2    | C16  | C11  | 123.09(18) | N1   | C16  | C11  | 114.22(15) |
| S1    | C17  | N1   | 120.51(13) | S1   | C17  | N2   | 124.08(17) |
| N1    | C17  | N2   | 115.41(17) | N2   | C18  | C19  | 122.33(19) |
| N2    | C18  | C23  | 121.60(18) | C19  | C18  | C23  | 116.0(2)   |
| F3    | C19  | C18  | 118.3(2)   | F3   | C19  | C20  | 118.7(2)   |
| C18   | C19  | C20  | 123.1(2)   | C19  | C20  | C21  | 116.9(2)   |
| F2    | C21  | C20  | 117.8(2)   | F2   | C21  | C22  | 118.2(2)   |
| C20   | C21  | C22  | 124.0(3)   | C21  | C22  | C23  | 116.2(2)   |
| F1    | C23  | C18  | 117.8(2)   | F1   | C23  | C22  | 118.38(18) |
| C18   | C23  | C22  | 123.8(2)   |      |      |      |            |

**Table S4.** Selected bond lengths (Å) for **5d**.

| <i>Experimental data X-Ray</i> |      |          | <i>Calculated data B3LYP/6-31G*</i> |      |          |
|--------------------------------|------|----------|-------------------------------------|------|----------|
| atom                           | atom | distance | atom                                | atom | distance |
| S1                             | C17  | 1.653(2) | S1                                  | C17  | 1.664    |
| F1                             | C23  | 1.345(2) | F1                                  | C23  | 1.346    |
| F2                             | C21  | 1.357(4) | F2                                  | C21  | 1.344    |
| F3                             | C19  | 1.344(3) | F3                                  | C19  | 1.34     |
| O1                             | C6   | 1.383(3) | O1                                  | C6   | 1.38     |
| O1                             | C9   | 1.434(3) | O1                                  | C7   | 1.438    |
| O2                             | C16  | 1.220(2) | O2                                  | C16  | 1.22     |
| N1                             | C16  | 1.375(3) | N1                                  | C16  | 1.398    |
| N1                             | C17  | 1.385(3) | N1                                  | C17  | 1.396    |
| N2                             | C17  | 1.339(2) | N2                                  | C17  | 1.363    |
| N2                             | C18  | 1.419(3) | N2                                  | C18  | 1.41     |
| C1                             | C2   | 1.473(5) | C23                                 | C22  | 1.539    |
| C2                             | C3   | 1.537(4) | C2                                  | C3   | 1.514    |
| C3                             | C4   | 1.384(3) | C3                                  | C4   | 1.404    |
| C3                             | C8   | 1.387(4) | C3                                  | C8   | 1.397    |
| C4                             | C5   | 1.387(4) | C4                                  | C5   | 1.404    |
| C5                             | C6   | 1.381(3) | C5                                  | C6   | 1.4      |
| C6                             | C7   | 1.379(3) | C6                                  | C7   | 1.366    |
| C7                             | C8   | 1.396(4) | C7                                  | C8   | 1.398    |
| C9                             | C10  | 1.498(3) | C9                                  | C10  | 1.507    |
| C10                            | C11  | 1.398(3) | C10                                 | C11  | 1.407    |
| C10                            | C15  | 1.385(4) | C10                                 | C15  | 1.396    |
| C11                            | C12  | 1.393(3) | C11                                 | C12  | 1.398    |
| C11                            | C16  | 1.496(3) | C11                                 | C16  | 1.506    |
| C12                            | C13  | 1.386(4) | C12                                 | C13  | 1.395    |



|             |             |                 |             |             |                 |
|-------------|-------------|-----------------|-------------|-------------|-----------------|
| C13         | C14         | 1.374(5)        | C13         | C14         | 1.394           |
| C14         | C15         | 1.374(4)        | C13         | C14         | 1.397           |
| C18         | C19         | 1.380(3)        | C18         | C19         | 1.401           |
| C18         | C23         | 1.370(3)        | C18         | C23         | 1.398           |
| C19         | C20         | 1.368(4)        | C19         | C20         | 1.387           |
| C20         | C21         | 1.362(4)        | C20         | C21         | 1.391           |
| C21         | C22         | 1.359(4)        | C21         | C22         | 1.39            |
| C22         | C23         | 1.375(4)        | C22         | C23         | 1.388           |
| <b>atom</b> | <b>atom</b> | <b>distance</b> | <b>atom</b> | <b>atom</b> | <b>distance</b> |

**Table S5.** Selected angles (°) for **5d**.

| Experimental data X-Ray |      |      |            | Calculated data B3LYP/6-31G* |      |      |        |
|-------------------------|------|------|------------|------------------------------|------|------|--------|
| atom                    | atom | atom | angle      | atom                         | atom | atom | angle  |
| C6                      | O1   | C9   | 116.91(15) | C6                           | O1   | C9   | 118.11 |
| C16                     | N1   | C17  | 128.47(16) | C16                          | N1   | C17  | 131.45 |
| C17                     | N2   | C18  | 123.09(18) | C17                          | N2   | C18  | 124.31 |
| C1                      | C2   | C3   | 113.2(2)   | C1                           | C2   | C3   | 112.87 |
| C2                      | C3   | C4   | 121.9(3)   | C2                           | C3   | C4   | 121.47 |
| C2                      | C3   | C8   | 121.3(2)   | C2                           | C3   | C8   | 121    |
| C4                      | C3   | C8   | 116.8(2)   | C4                           | C3   | C8   | 117.51 |
| C3                      | C4   | C5   | 122.2(3)   | C3                           | C4   | C5   | 121.93 |
| C4                      | C5   | C6   | 119.7(2)   | C4                           | C5   | C6   | 119.31 |
| O1                      | C6   | C5   | 116.02(18) | O1                           | C6   | C5   | 116    |
| O1                      | C6   | C7   | 124.2(2)   | O1                           | C6   | C7   | 124.15 |
| C5                      | C6   | C7   | 119.8(2)   | C5                           | C6   | C7   | 119.85 |
| C3                      | C8   | C7   | 122.1(2)   | C3                           | C8   | C7   | 121.93 |
| O1                      | C9   | C10  | 108.86(18) | O1                           | C9   | C10  | 107.16 |
| C9                      | C10  | C11  | 121.5(2)   | C9                           | C10  | C11  | 120.1  |
| C9                      | C10  | C15  | 120.2(2)   | C9                           | C10  | C15  | 120.83 |
| C11                     | C10  | C15  | 118.2(2)   | C11                          | C10  | C15  | 119    |
| C10                     | C11  | C12  | 120.2(2)   | C10                          | C11  | C12  | 120.12 |
| C10                     | C11  | C16  | 120.69(18) | C10                          | C11  | C16  | 120.4  |
| C12                     | C11  | C16  | 119.0(2)   | C12                          | C11  | C16  | 119.29 |
| C11                     | C12  | C13  | 120.1(2)   | C11                          | C12  | C13  | 120.24 |
| C12                     | C13  | C14  | 119.5(3)   | C12                          | C13  | C14  | 119.89 |
| C13                     | C14  | C15  | 120.5(3)   | C13                          | C14  | C15  | 119.86 |
| C10                     | C15  | C14  | 121.4(3)   | C10                          | C15  | C14  | 120.86 |
| O2                      | C16  | N1   | 122.7(2)   | O2                           | C16  | N1   | 119.59 |
| O2                      | C16  | C11  | 123.09(18) | O2                           | C16  | C11  | 121.73 |
| N1                      | C16  | C11  | 114.22(15) | N1                           | C16  | C11  | 118.46 |
| S1                      | C17  | N1   | 120.51(13) | S1                           | C17  | N1   | 120.67 |
| S1                      | C17  | N2   | 124.08(17) | S1                           | C17  | N2   | 125.78 |
| N1                      | C17  | N2   | 115.41(17) | N1                           | C17  | N2   | 113.52 |
| N2                      | C18  | C19  | 122.33(19) | N2                           | C18  | C19  | 122.26 |
| N2                      | C18  | C23  | 121.60(18) | N2                           | C18  | C23  | 121.16 |
| C19                     | C18  | C23  | 116.0(2)   | C19                          | C18  | C23  | 116.51 |
| F3                      | C19  | C18  | 118.3(2)   | F3                           | C19  | C18  | 118.51 |
| F3                      | C19  | C20  | 118.7(2)   | F3                           | C19  | C20  | 118.79 |
| C18                     | C19  | C20  | 123.1(2)   | C18                          | C19  | C20  | 122.7  |
| C19                     | C20  | C21  | 116.9(2)   | C19                          | C20  | C21  | 117.67 |
| F2                      | C21  | C20  | 117.8(2)   | F2                           | C21  | C20  | 118.7  |

|     |     |     |            |     |     |     |        |
|-----|-----|-----|------------|-----|-----|-----|--------|
| F2  | C21 | C22 | 118.2(2)   | F2  | C21 | C22 | 118.68 |
| C20 | C21 | C22 | 124.0(3)   | C20 | C21 | C22 | 122.62 |
| C21 | C22 | C23 | 116.2(2)   | C21 | C22 | C23 | 117.28 |
| F1  | C23 | C18 | 117.8(2)   | F1  | C23 | C18 | 118.16 |
| F1  | C23 | C22 | 118.38(18) | F1  | C23 | C22 | 118.64 |
| C18 | C23 | C22 | 123.8(2)   | C18 | C23 | C22 | 123.2  |

**Table S6.** Experimental and theoretical  $^1\text{H}$ -,  $^{13}\text{C}$ - and  $^{19}\text{F}$  correlation NMR for **5d**.

| <i>Experimental data</i> $^1\text{H}$ -NMR(dms $\text{o-d}_6$ , $\delta$ ppm, $J$ Hz)                                   | <i>Calculated data</i> DFT/B3LYP/6-31G* |
|-------------------------------------------------------------------------------------------------------------------------|-----------------------------------------|
| 12.14 (br s, 1H, NH)                                                                                                    | 7.29 (1H, NH)                           |
| 11.56 (br s, 1H, NH)                                                                                                    | 6.94 (1H, NH)                           |
| 7.64 (dd, $J = 1.2$ Hz, $J = 7.6$ Hz, 1H, H-7)                                                                          | 7.54 ( $^3J = 6.9$ , 1H, H-7)           |
| 7.60 (m, 1H, H-4)                                                                                                       | 7.11 ( $^3J = 6.9$ , 1H, H-4)           |
| 7.57 (td, $J = 1.2$ Hz, $J = 7.6$ Hz, 1H, H-5)                                                                          | 7.24 ( $^3J = 6.7$ 6.9, 1H, H-5)        |
| 7.47 (td, $J = 1.42$ Hz, $J = 7.5$ Hz, 1H, H-6)                                                                         | 7.38 ( $^3J = 6.7$ 6.9, 1H, H-6)        |
| 7.30 (m, 2H, H-19, H-21)                                                                                                | 6.09(2H, H-19, H-21)                    |
| 7.08 (d, $J = 8.6$ Hz, 2H, H-11, H-13)                                                                                  | 7.06( $^3J = 7.7$ , 2H, H-11, H-13)     |
| 6.89 (d, $J = 8.6$ Hz, 2H, H-10, H-14)                                                                                  | 6.73( $^3J = 7.7$ , 2H, H-10, H-14)     |
| 5.27 (s, 2H, H-8)                                                                                                       | 4.89 (2H, H-8)                          |
| 2.51 (q, $J = 7.5$ Hz, 2H, H-15)                                                                                        | 2.53( $^3J = 6.6$ (x3), 2H, H-15)       |
| 1.14 (t, $J = 7.5$ Hz, 3H, H-15')                                                                                       | 1.18 ( $^3J = 6.6$ (x2), 3H, H-15')     |
| <i>Experimental data</i> $^{13}\text{C}$ -NMR (dms $\text{o-d}_6$ , $\delta$ ppm)                                       | <i>Calculated data</i> DFT/B3LYP/6-31G* |
| 182.27 (C-16)                                                                                                           | 186.63 (C-16)                           |
| 169.75 (C-1)                                                                                                            | 170.31(C-1)                             |
| 160.82 (dt, $^3J_{(\text{C}20-\text{F}18, 22)} = 30.2$ Hz,<br>$J_{(\text{C}20-\text{F}20)} = 247.1$ Hz, C-20)           | 159.93 (C-20)                           |
| 158.15 (ddd, $J_{(\text{C-F})} = 7.3$ Hz, $J_{(\text{C-F})} = 16.1$ Hz,<br>$J_{(\text{C-F})} = 250.0$ Hz, C-18, C-22)   | 158.34 (C-18, C-22)                     |
| 156.12 (C-9)                                                                                                            | 155.85 (C-9)                            |
| 136.19 (Cq)                                                                                                             | 137.27 (C-2)                            |
| 135.86 (Cq)                                                                                                             | 137.15 (C-12)                           |
| 132.97 (Cq)                                                                                                             | 135.35 (C-3)                            |
| 131.04 (C-5)                                                                                                            | 129.42 (C-5)                            |
| 128.61 (C-4)                                                                                                            | 130.06 (C-4)                            |
| 128.51 (C-11, C-13)                                                                                                     | 129.54 (C-11, C-13)                     |
| 128.46 (C-7)                                                                                                            | 128.35 (C-7)                            |
| 127.68 (C-6)                                                                                                            | 129.31 (C-6)                            |
| 114.68 C-10, C-14)                                                                                                      | 113.78 (C-10, C-14)                     |
| 113.35 (td, $J_{(\text{C}17-\text{F}20)} = 5.1$ Hz,<br>$J_{(\text{C}17-\text{F}18, 22)} = 16.5$ Hz, C-17)               | 115.47 (C-17)                           |
| 100.76 (td, $J_{(\text{C}19, 21-\text{F}20)} = 3.6$ Hz,<br>$J_{(\text{C}19, 21-\text{F}18, 22)} = 27.1$ Hz, C-19, C-21) | 100.74 (C-19, C-21)                     |
| 67.53 (C-8)                                                                                                             | 68.79 (C-8)                             |
| 27.21 (C-15)                                                                                                            | 30.99 (C-15)                            |
| 15.74 (C-15')                                                                                                           | 20.05 (C-15')                           |
| <i>Experimental data</i> $^{19}\text{F}$ -NMR (dms $\text{o-d}_6$ , $\delta$ ppm)                                       | <i>Calculated data</i> DFT/B3LYP/6-31G* |
| -108.85 (m, F-20)                                                                                                       | -112.14 (F-20)                          |
| -114.85 (m, F-18, F-22)                                                                                                 | -117.00 (F-18, F-22)                    |

**Table S7.** The list of intermolecular interactions between the ligand molecules docked with 4DUH (*E. coli* DNA gyrase B) using CLC Drug Discovery Workbench Software.

| Comp.                | Score/<br>RMSD  | Interacting group                                                                                                                                                                                                                                                               | Hydrogen bond                                                 | Bond<br>length |
|----------------------|-----------------|---------------------------------------------------------------------------------------------------------------------------------------------------------------------------------------------------------------------------------------------------------------------------------|---------------------------------------------------------------|----------------|
| Co-crys-<br>tallized | -72.04<br>/0.08 | LYS 103:A, ALA 100:A, GLY 102:A,<br>GLY 101:A, ILE 94:A, PRO 79:A,<br>ILE 78:A, ARG 76:A, GLY 75:A,<br>THR 165:A, ASP 73:A, GLN 72:A, VAL 71:A,<br>VAL 167:A, GLU 50:A, ASN 46:A, VAL<br>120:A, VAL 43:A, ALA 47:A                                                              | O sp <sup>2</sup> (O12) – N sp <sup>2</sup> from ARG<br>136:A | 3.069 Å        |
|                      |                 |                                                                                                                                                                                                                                                                                 | O sp <sup>2</sup> (O12) – N sp <sup>2</sup> from ARG<br>136:A | 2.700 Å        |
|                      |                 |                                                                                                                                                                                                                                                                                 | O sp <sup>2</sup> (O12) – N sp <sup>2</sup> from ARG<br>76:A  | 3.138 Å        |
|                      |                 |                                                                                                                                                                                                                                                                                 | N sp <sup>3</sup> (N13) – O sp <sup>2</sup> from GLY<br>101:A | 3.146 Å        |
|                      |                 |                                                                                                                                                                                                                                                                                 | H- O sp <sup>2</sup> from ASP 73:A                            | 1.822 Å        |
| 5a                   | -61.58<br>/0.05 | LYS 103:A, ALA 100:A, GLY 102:A,<br>GLY 101:A, ILE 94:A, PRO 79:A,<br>ILE 78:A, ARG 76:A, ARG 136:A,<br>GLY 77:A, MET 166:A, THR 165:A, ASP 73:A,<br>GLN 72:A, VAL 71:A,<br>VAL 167:A, VAL 44:A, GLU 50:A, ASN<br>46:A, VAL 120:A, VAL 43:A, ALA 47:A, ASP<br>49:A, ALA 53:A    | O sp <sup>2</sup> (O1) – N sp <sup>2</sup> from ASN<br>46:A   | 3.082 Å        |
|                      |                 |                                                                                                                                                                                                                                                                                 | O sp <sup>2</sup> (O2) – N sp <sup>2</sup> from ILE<br>78:A   | 3.305 Å        |
|                      |                 |                                                                                                                                                                                                                                                                                 | N sp <sup>2</sup> (N1) – O sp <sup>2</sup> from GLY<br>77:A   | 2.974 Å        |
| 5b                   | -59.66<br>/0.46 | LYS 103:A, ALA 100:A, GLY 102:A,<br>GLY 101:A, ILE 94:A, PRO 79:A,<br>ILE 78:A, ARG 76:A, ARG 136:A,<br>GLY 77:A, THR 165:A, ASP 73:A,<br>VAL 120:A, GLY 119:A, SER 121:A, PHE<br>104:A, HIS 99:A, VAL 118:A, GLY 117:A,<br>GLU 42:A, ASP 45:A, ASN 46:A, ASP 49:A,<br>ASP 73:A | O sp <sup>2</sup> (O2) – N sp <sup>2</sup> from LYS<br>103:A  | 3.043 Å        |
|                      |                 |                                                                                                                                                                                                                                                                                 | O sp <sup>2</sup> (O2) – N sp <sup>2</sup> from GLY<br>102:A  | 3.187 Å        |
|                      |                 |                                                                                                                                                                                                                                                                                 | O sp <sup>2</sup> (O2) – N sp <sup>2</sup> from GLY<br>101:A  | 3.119 Å        |
| 5c                   | -57.73<br>/0.08 | ASN 46:A, GLU 42:A, GLU 50:A, ARG 76:A,<br>GLY 77:A, ARG 136:A, ILE 78:A, PRO 79:A,<br>ALA 90:A, GLY 102:A, ILE 94:A, MET 95:A,<br>ALA 100:A, LYS 103:A, HIS 99:A, SER 121:A,<br>VAL 120:A, GLY 119:A                                                                           | N sp <sup>2</sup> (N2) – O sp <sup>2</sup> from GLY<br>101:A  | 3.234 Å        |
| 5d                   | -56.80<br>/0.20 | GLU 42:A, GLY 119:A, SER 121:A, VAL<br>120:A, HIS 99:A, ASN 46:A, MET 95:A, ALA<br>100:A, ILE 94:A, GLY 101:A, ILE 78:A, PRO<br>79:A, GLY 77:A, ALA 90:A, HIS 83:A, GLY<br>81:A, ARG 136:A, ARG 76:A, GLU 50:A,<br>GLY 102:A, LYS 103:A, GLU 42:A, GLY<br>119:A, HIS 99:A       | N sp <sup>2</sup> (N2) – O sp <sup>2</sup> from GLY<br>101:A  | 3.144 Å        |
|                      |                 |                                                                                                                                                                                                                                                                                 | N sp <sup>2</sup> (N1) – O sp <sup>2</sup> from GLY<br>101:A  | 3.381 Å        |
| 5e                   | -63.91<br>/0.10 | VAL 44:A, VAL 71:A, GLN 72:A, ASP 73:A,<br>VAL 167:A, MET 166:A, THR 165:A, ASP<br>49:A, ASN 46:A, ALA 53:A, VAL 43:A, ALA<br>47:A, GLU 50:A, LYS 103:A, VAL 120:A, GLY<br>102:A, GLY 101:A, ALA 100:A, ILE 94:A,<br>PRO 79:A, ILE 78:A, GLY 77:A, ARG136:A                     | O sp <sup>3</sup> (O1) – N sp <sup>2</sup> from ASN<br>46:A   | 2.870 Å        |
|                      |                 |                                                                                                                                                                                                                                                                                 | O sp <sup>2</sup> (O2) – N sp <sup>2</sup> from ILE<br>78:A   | 3.244 Å        |
|                      |                 |                                                                                                                                                                                                                                                                                 | N sp <sup>2</sup> (N1) – O sp <sup>2</sup> from GLY<br>77:A   | 2.924 Å        |
| 5f                   | -56.18<br>/0.22 | HIS 83:A, ALA 90:A, ILE 94:A, GLY 101:A,<br>ILE 78:A, PRO 79:A, ARG 136:A, GLY 77:A,<br>ARG 76:A, ARG 164:A, GKY 75:A, THR<br>165:A, LYS 103:A, VAL 120:A, ASN 46:A,<br>GLU 50:A, ASP 73:A, ALA 47:A                                                                            | N sp <sup>2</sup> (N2) – O sp <sup>2</sup> from GLY<br>101:A  | 2.866 Å        |
|                      |                 |                                                                                                                                                                                                                                                                                 | O sp <sup>3</sup> (O1) – N sp <sup>2</sup> from ARG<br>76:A   | 3.247 Å        |
| 5g                   | -59.92<br>/0.24 | ALA 100:A, VA; 120:A, LYS 103:A, ILE 94:A,<br>GLY 102:A, GLY 101:A, PRO 79:A, ILE 78:A,                                                                                                                                                                                         | N sp <sup>2</sup> (N1) – O sp <sup>2</sup> from GLY<br>77:A   | 2.952 Å        |

---

LEU 132:A, GLY 77:A, ARG 136:A, ARG  
76:A, GLY 75:A, GLU 50:A, THR 165:A, MET  
166:A, ASP 49:A, ASN 46:A, VAL 43:A, VAL  
167:A, ALA 47:A, VAL 71:A, ASP 73:A, GLN  
72:A

---

O sp<sup>3</sup>(O1) – N sp<sup>2</sup> from ASN  
46:A

3.020 Å
